# Supplementary material for: Application of a hierarchical enzyme classification method reveals the role of gut microbiome in human metabolism
Source: PubMed Central journal article supplement (PMC4474468; doi:10.1186/1471-2164-16-s7-s16), 2015-06-11

**SULFUR METABOLISM**

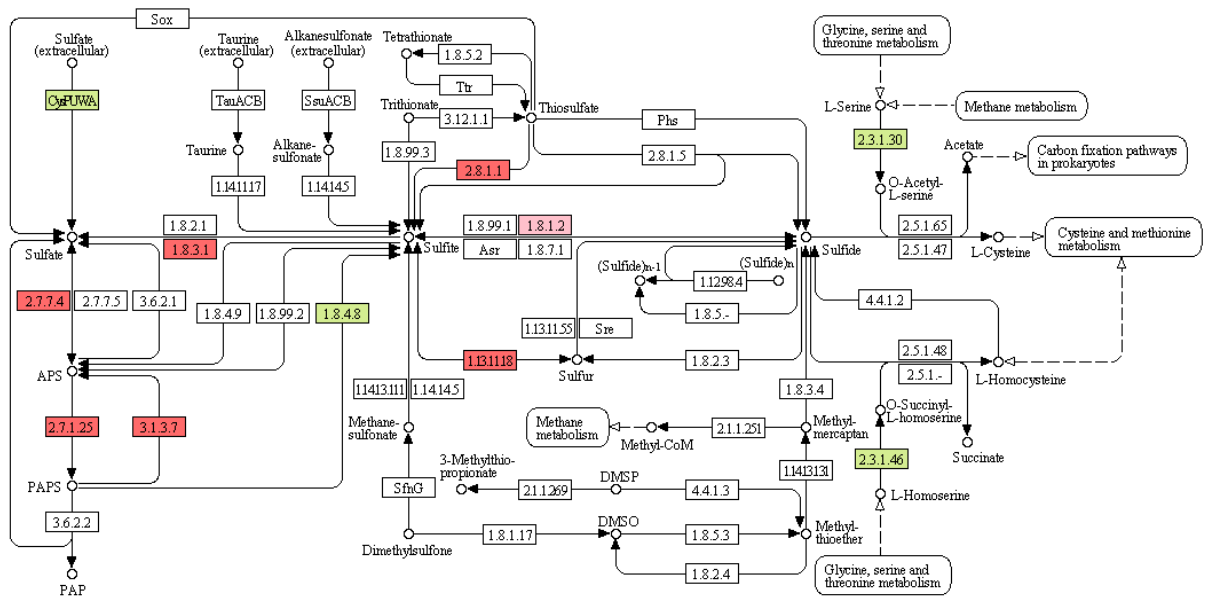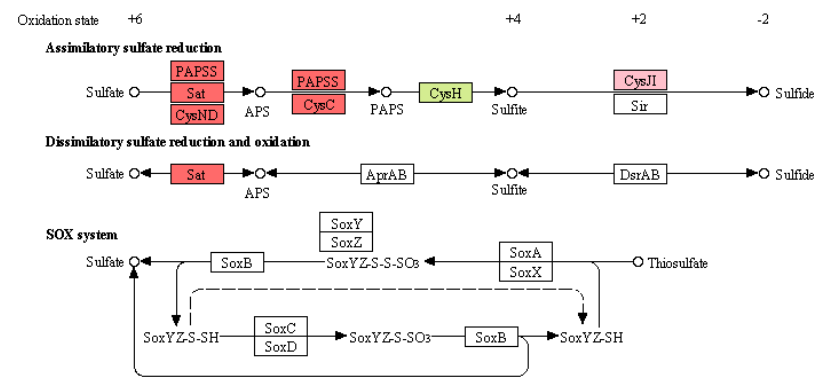

**NITROGEN METABOLISM**

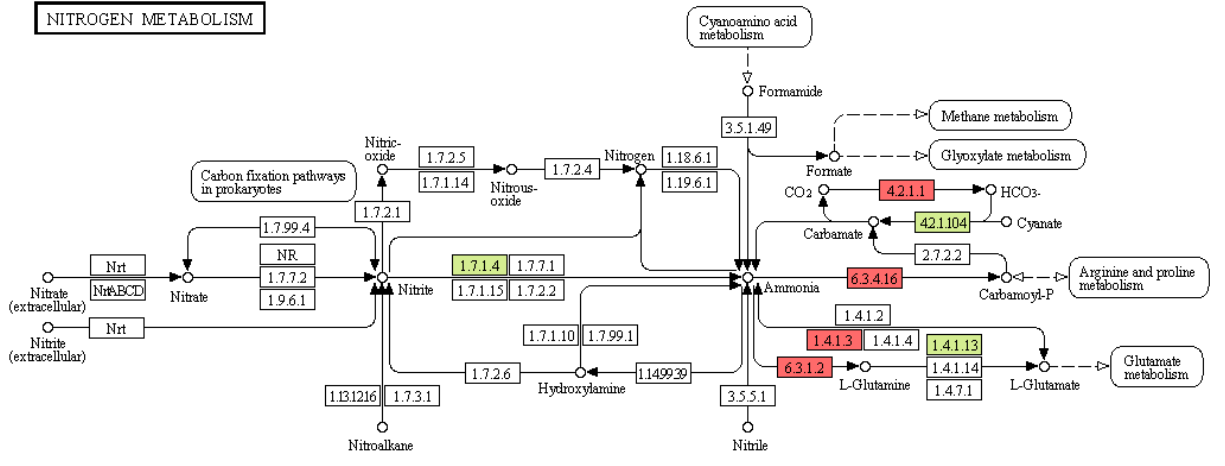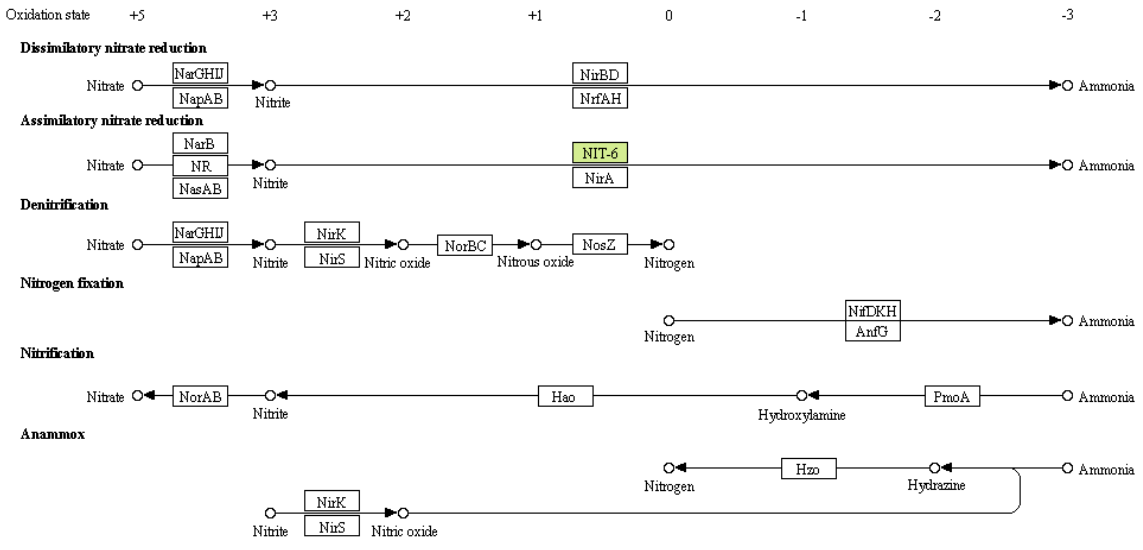

TERPENOID BACKBONE BIOSYNTHESIS

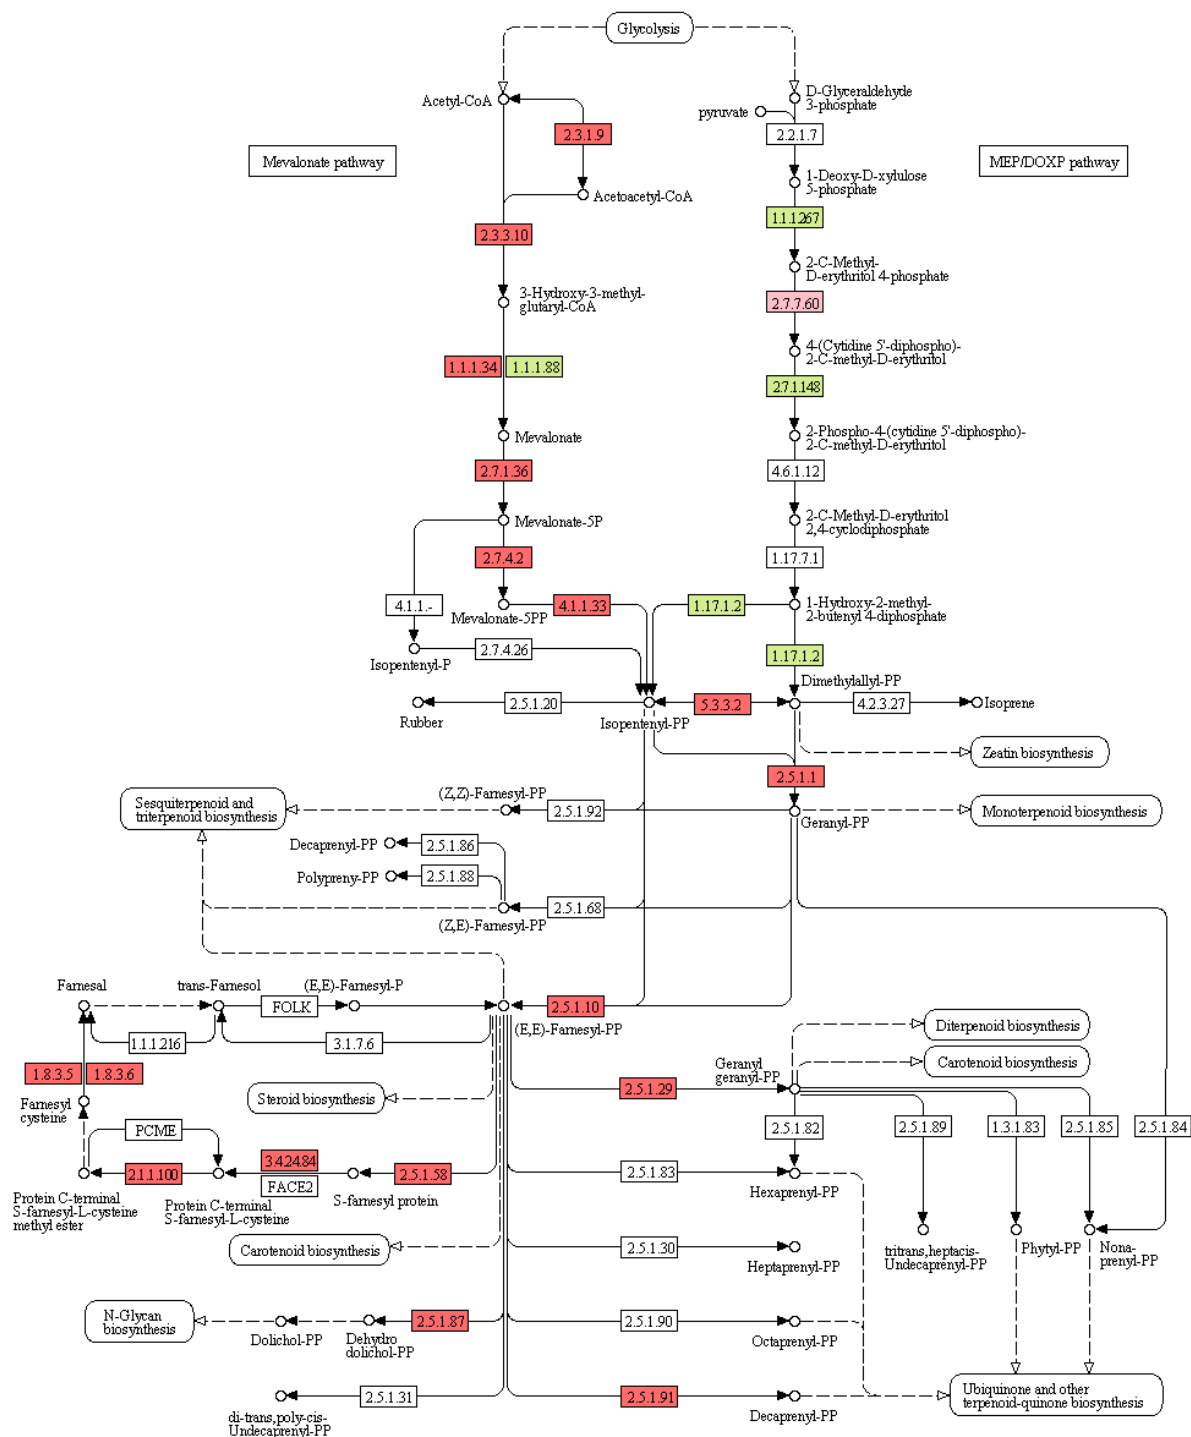

# FOLATE BIOSYNTHESIS

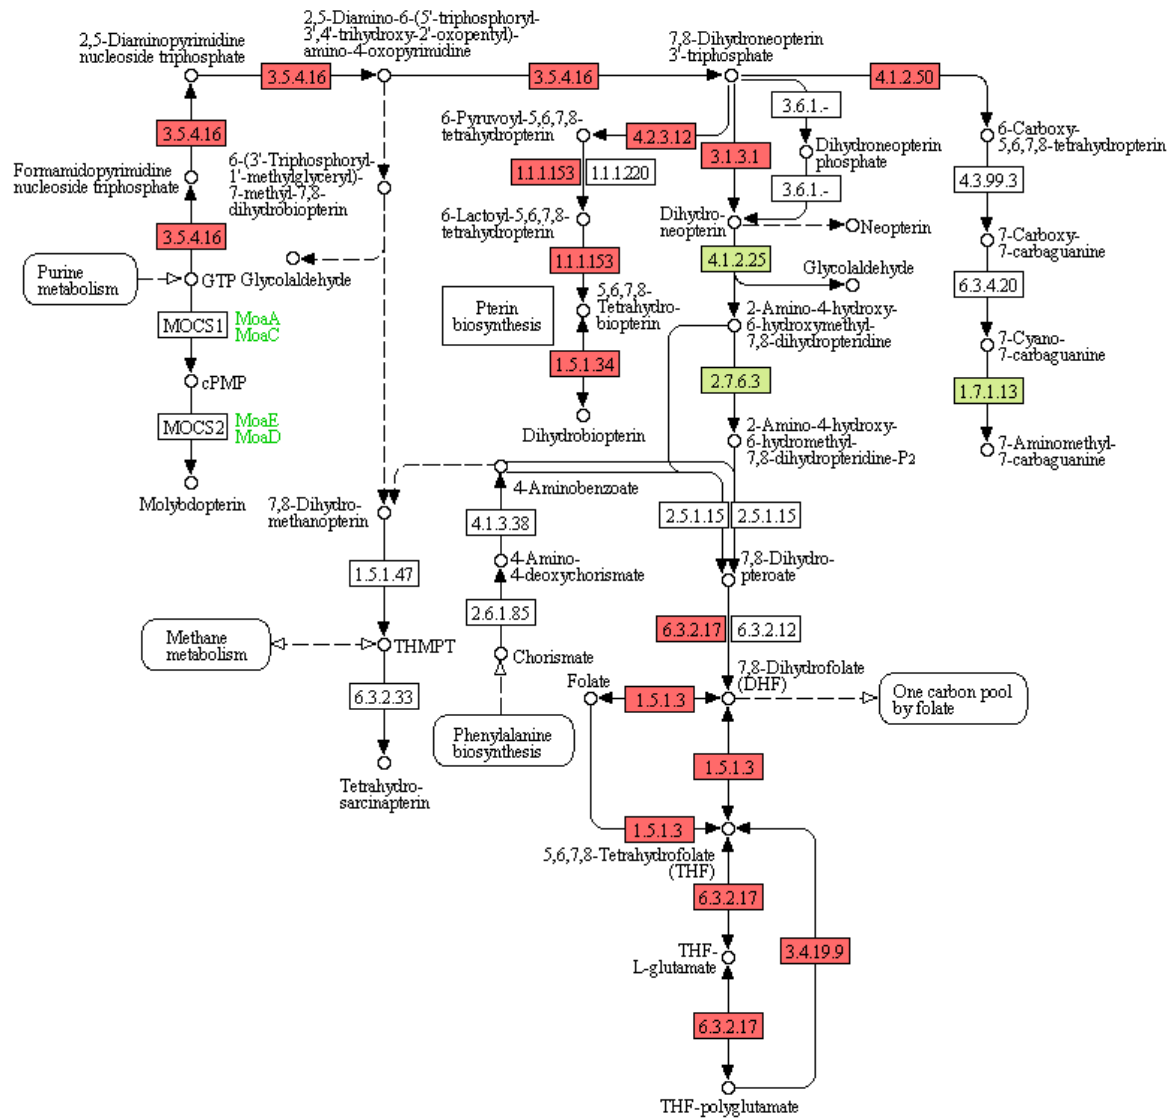

# LIPOIC ACID METABOLISM

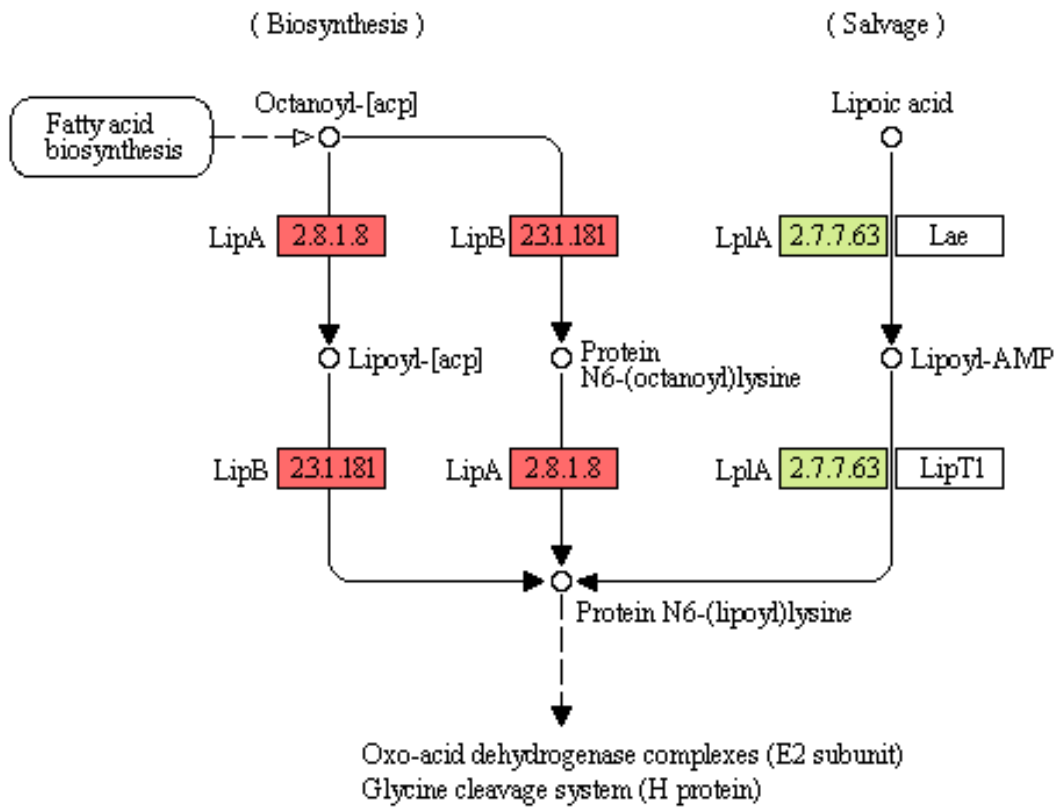

# BIOTIN METABOLISM

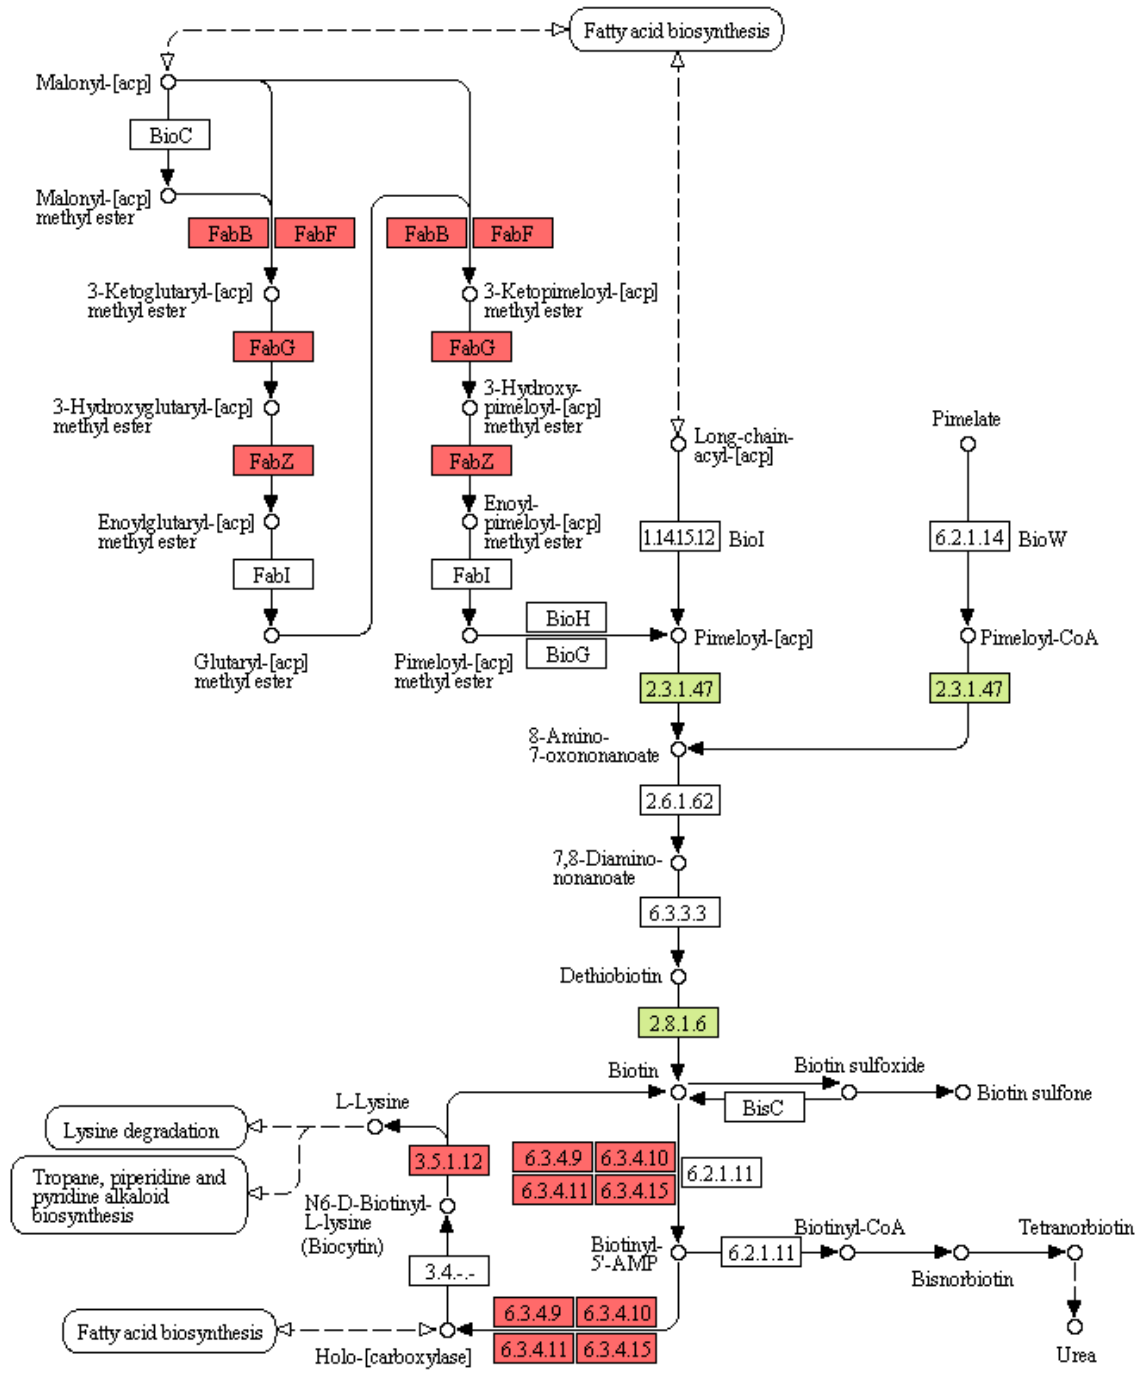

### PANTOTHENATE AND CoA BIOSYNTHESIS

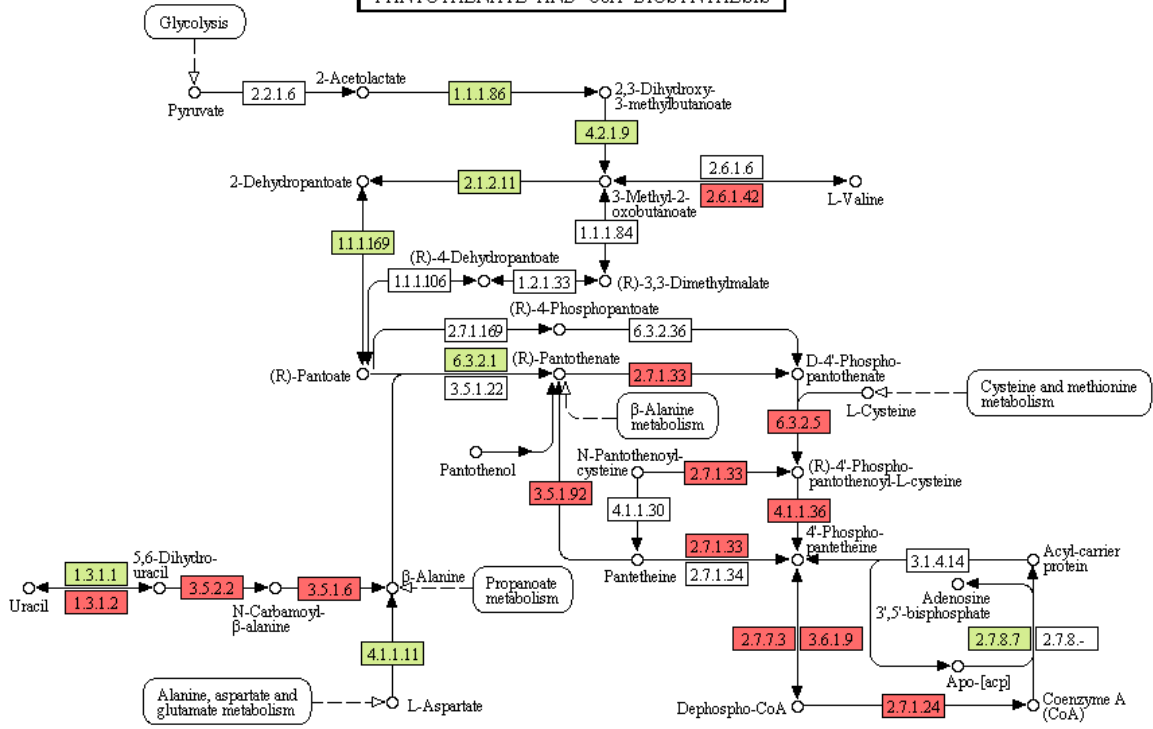

NICOTINATE AND NICOTINAMIDE METABOLISM

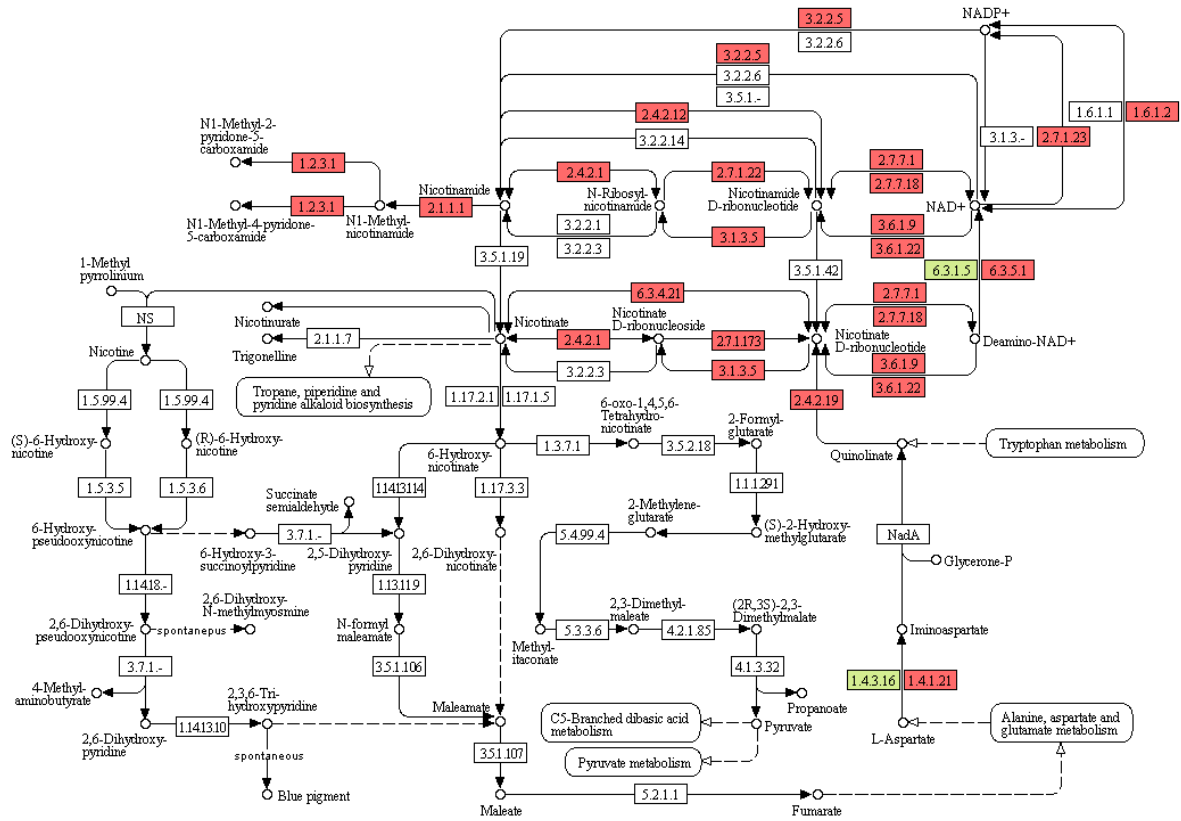



# VITAMINE B6 METABOLISM

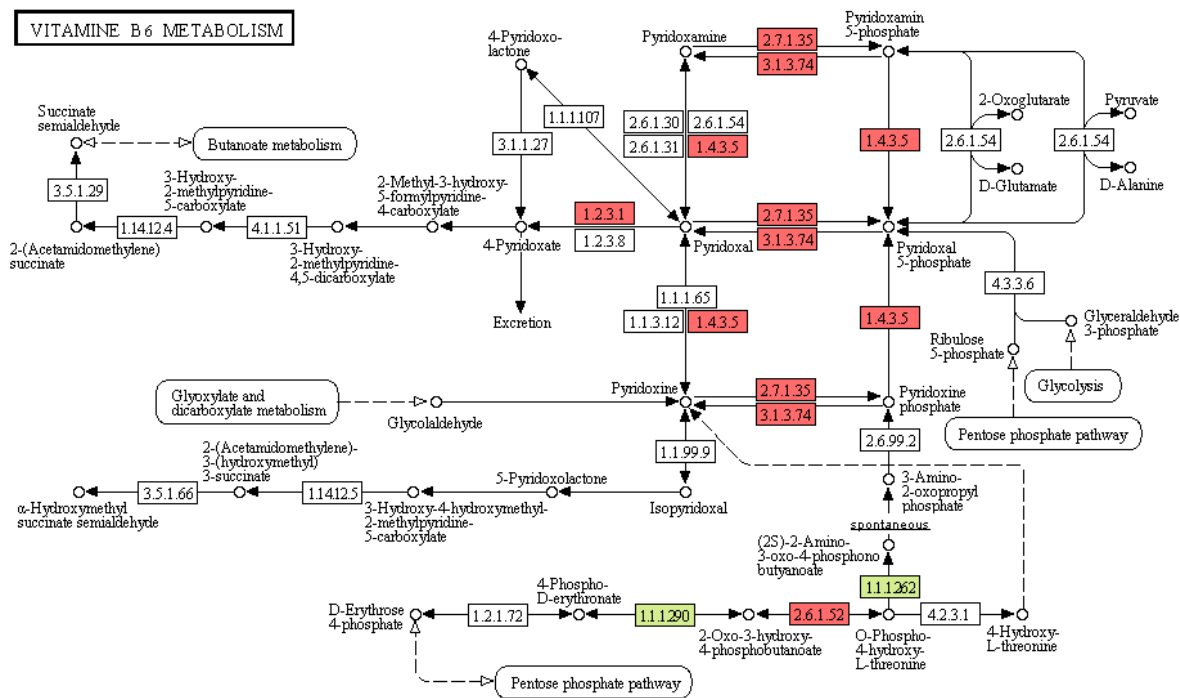

**THIAMINE METABOLISM**

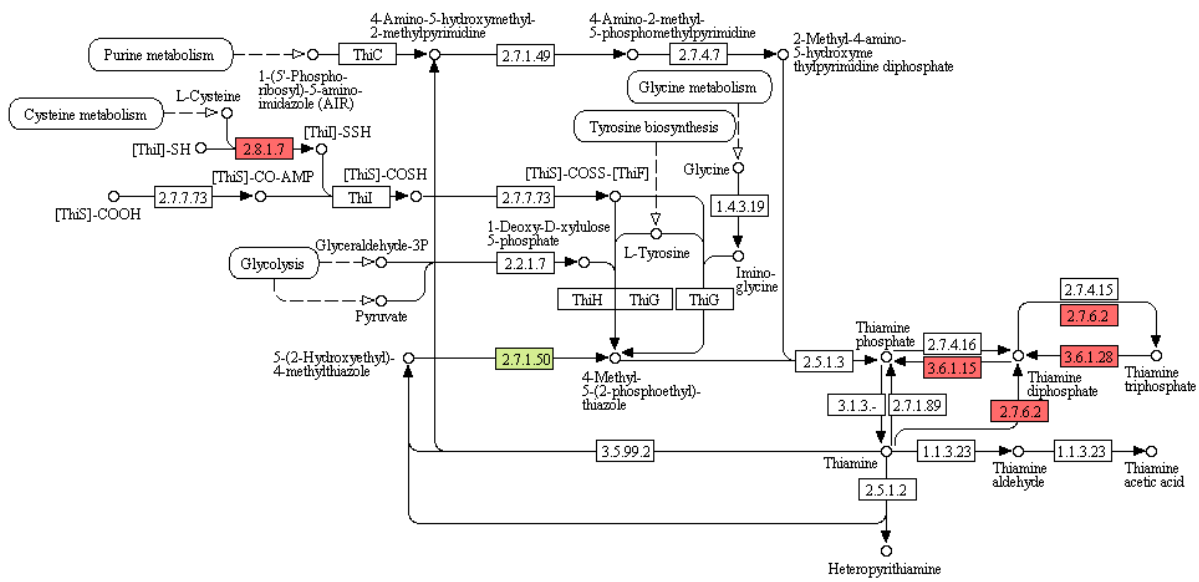

ONE CARBON POOL BY FOLATE

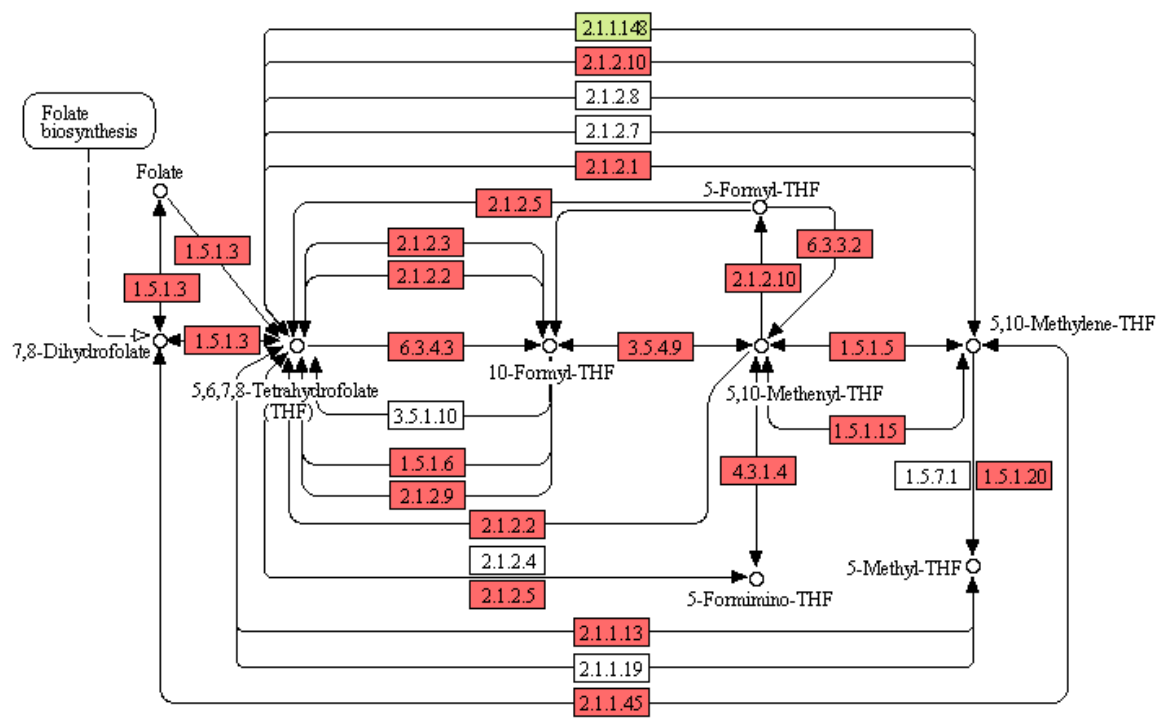

BUTANOATE METABOLISM

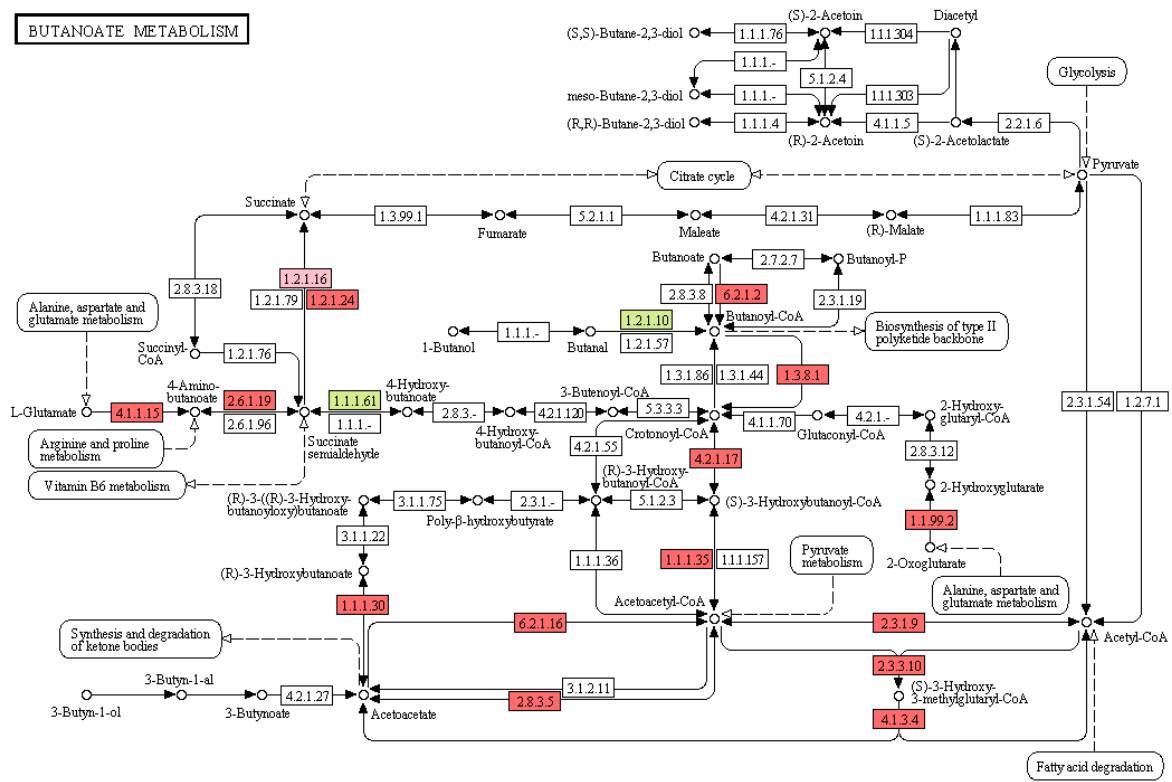

00650 12/26/13  
(c) Kanehisa Laboratories

**PROPANOATE METABOLISM**

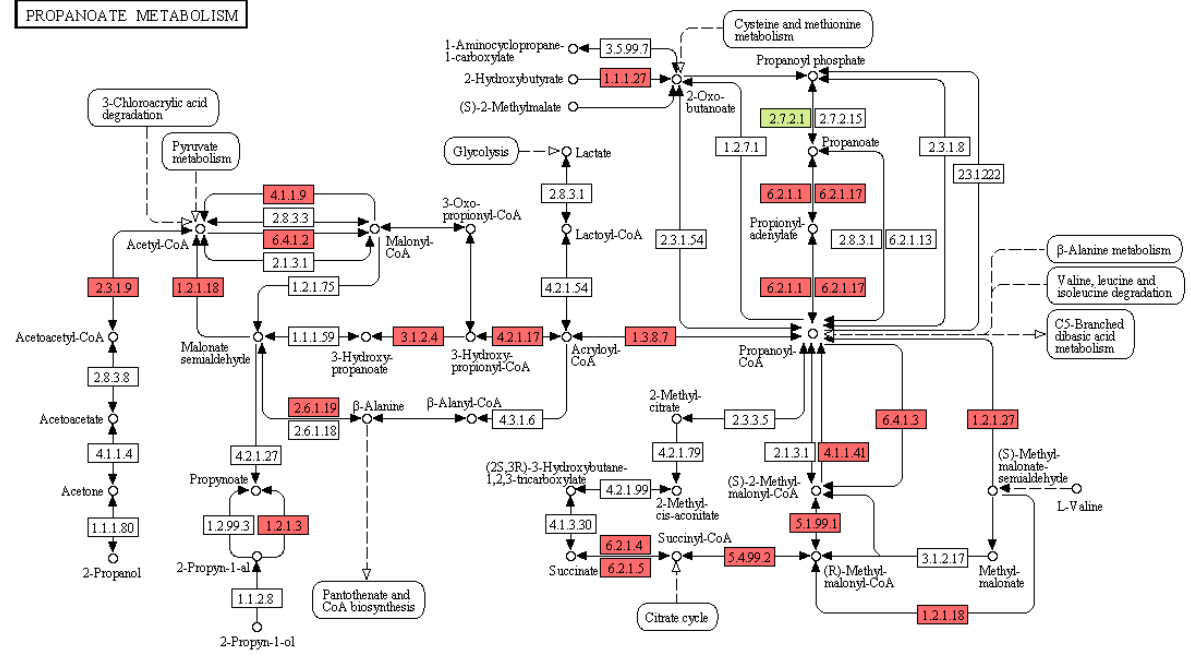

GLYOXYLATE AND DICARBOXYLATE METABOLISM

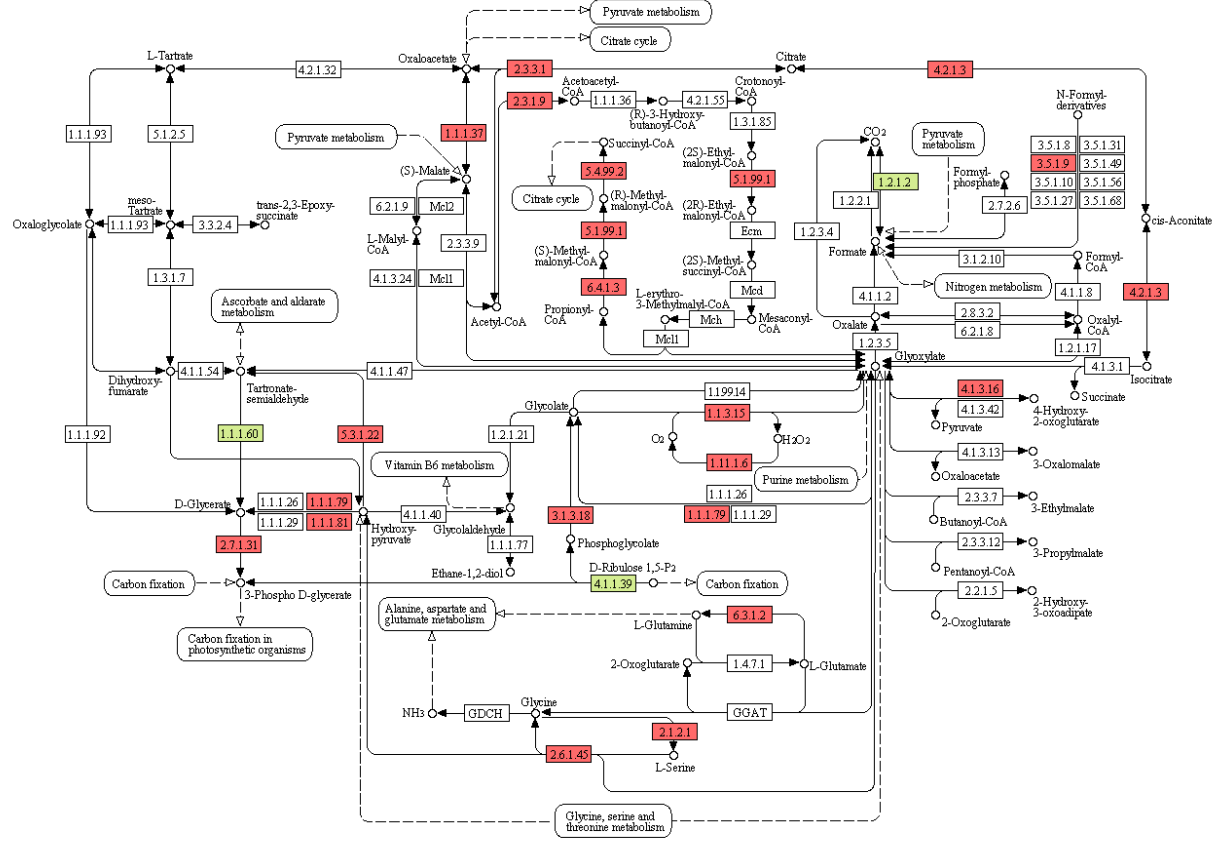

# PYRUVATE METABOLISM

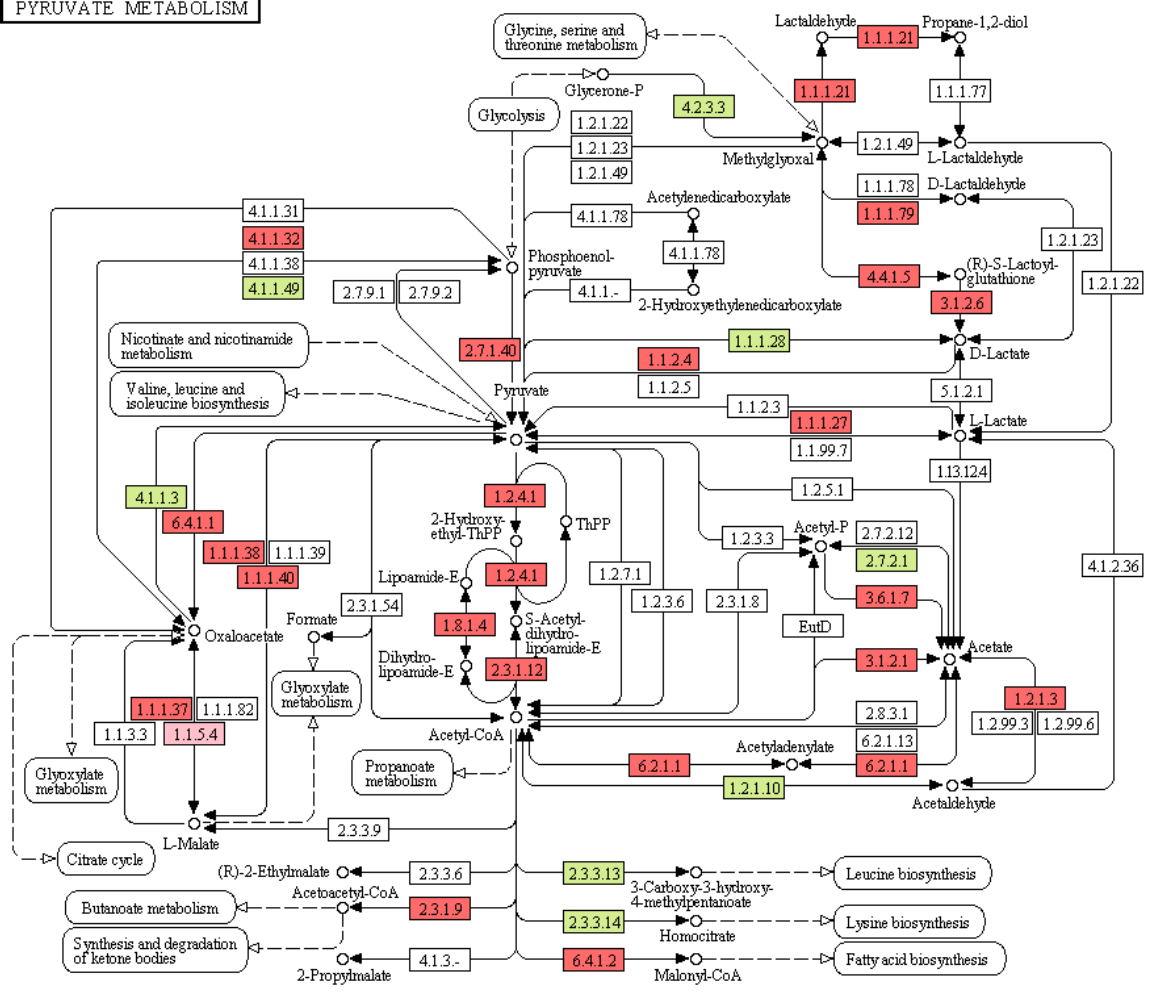

**GLYCEROPHOSPHOLIPID METABOLISM**

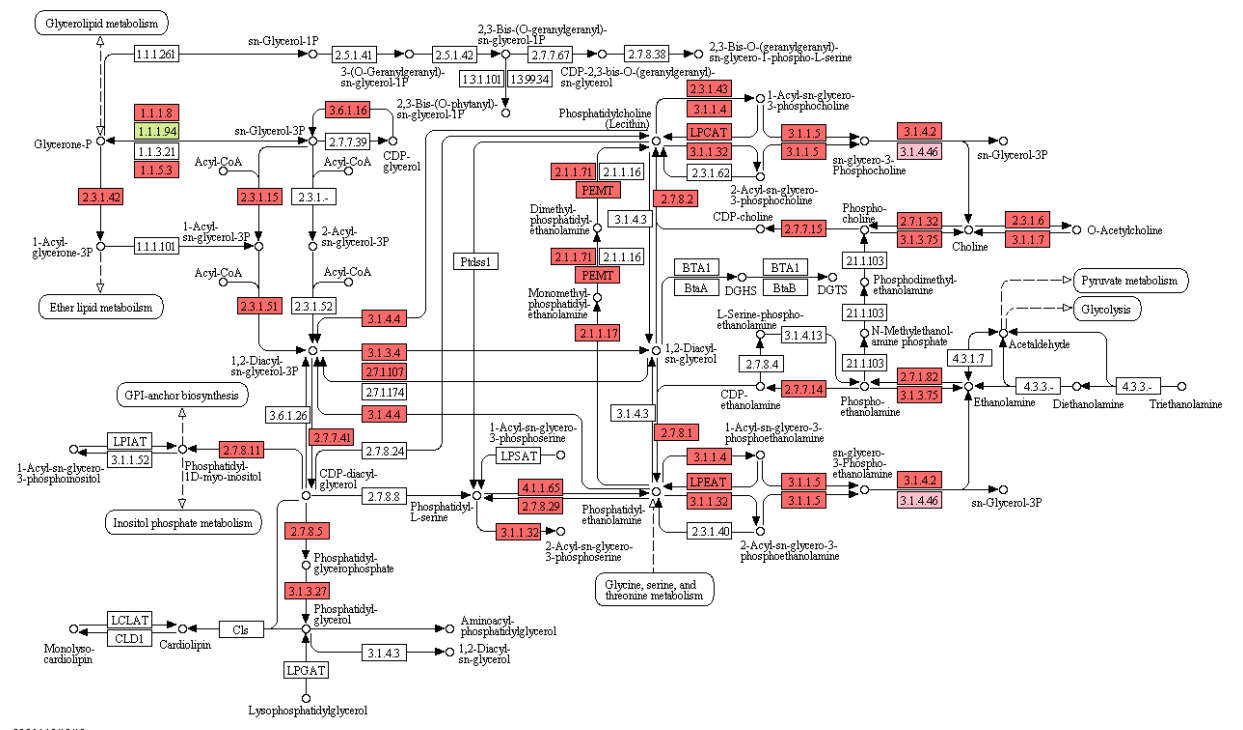



**INOSITOL PHOSPHATE METABOLISM**

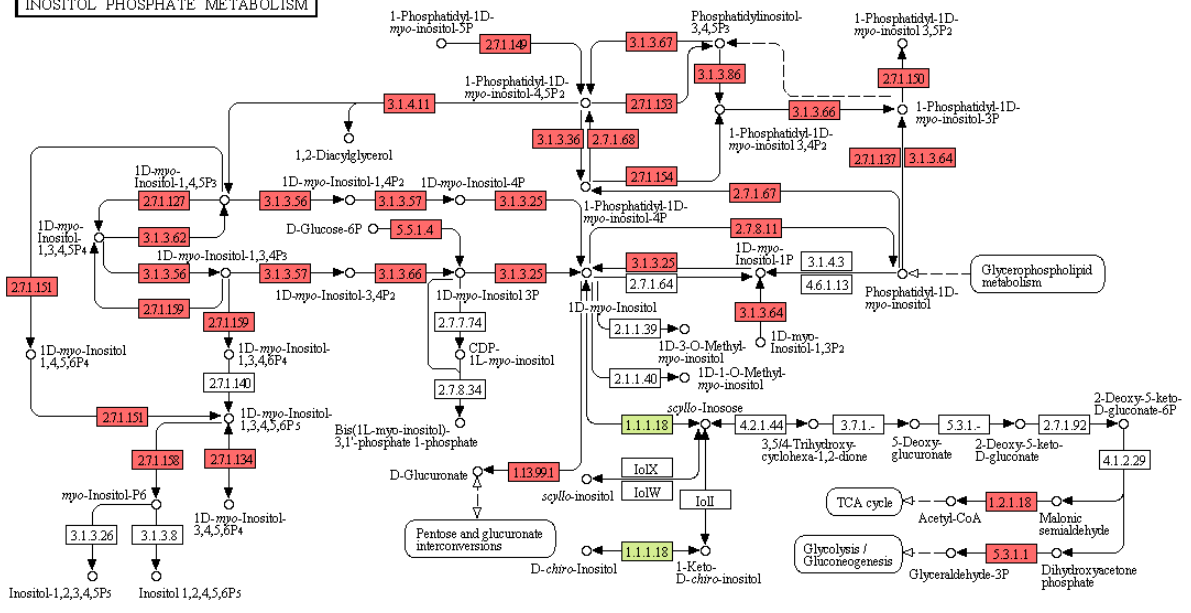

### AMINO SUGAR AND NUCLEOTIDE SUGAR METABOLISM

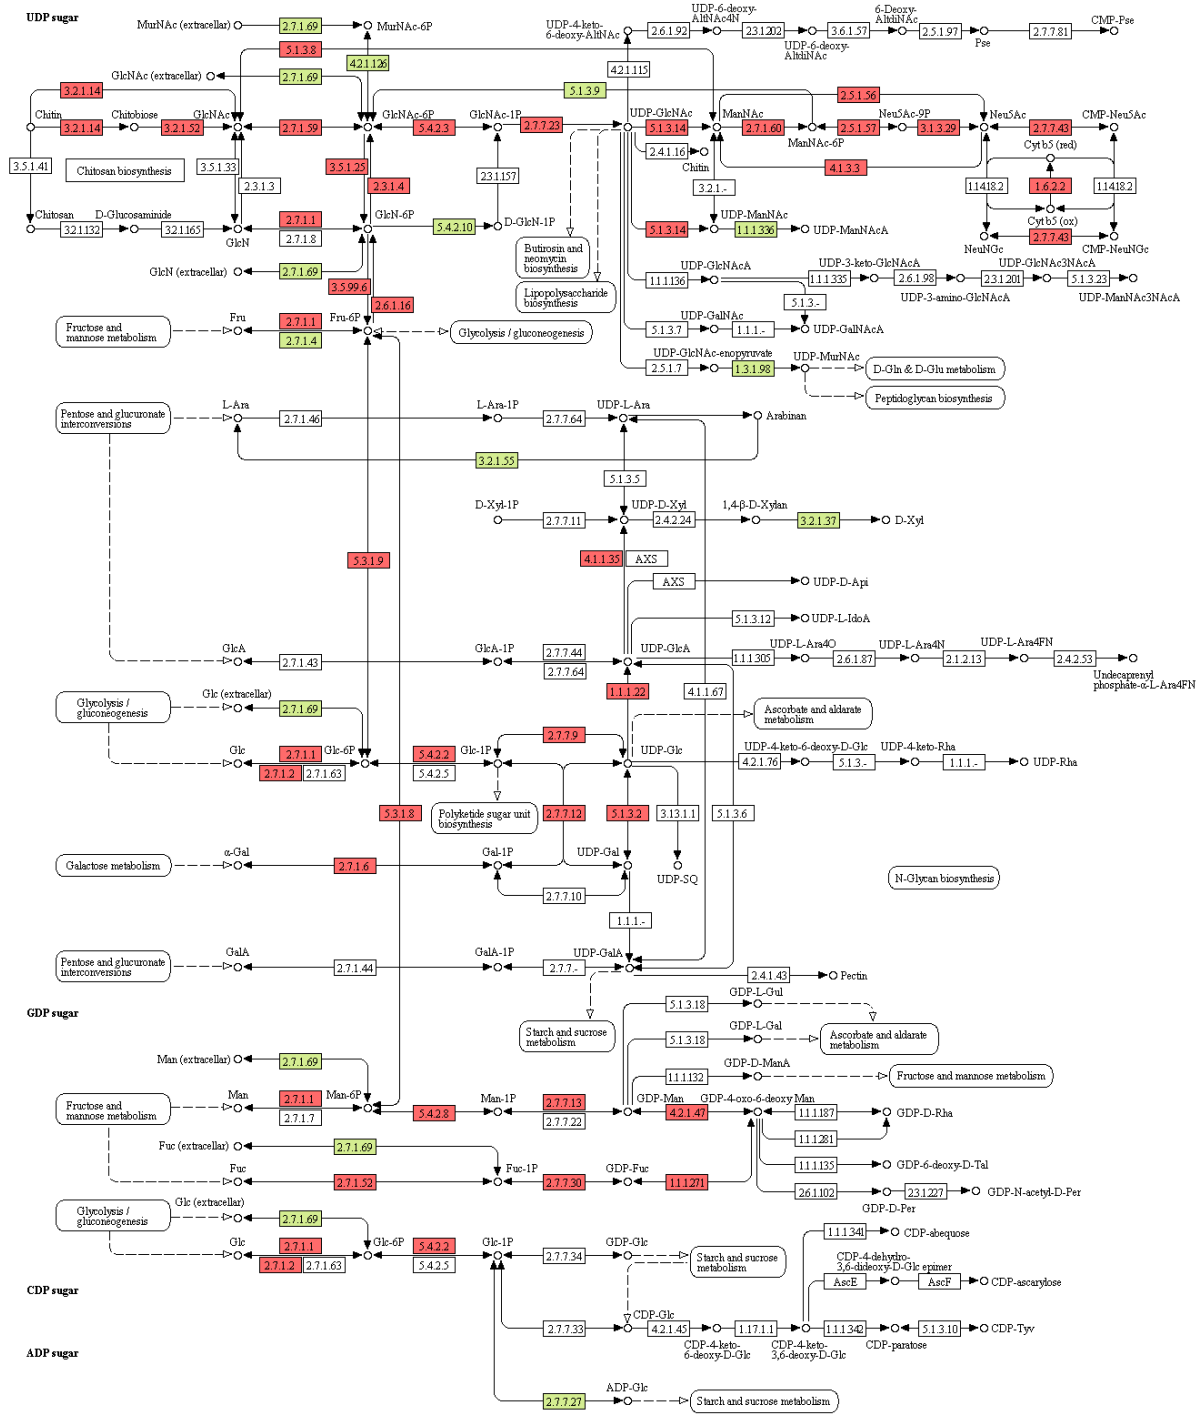

# D-GLUTAMINE AND D-GLUTAMATE METABOLISM

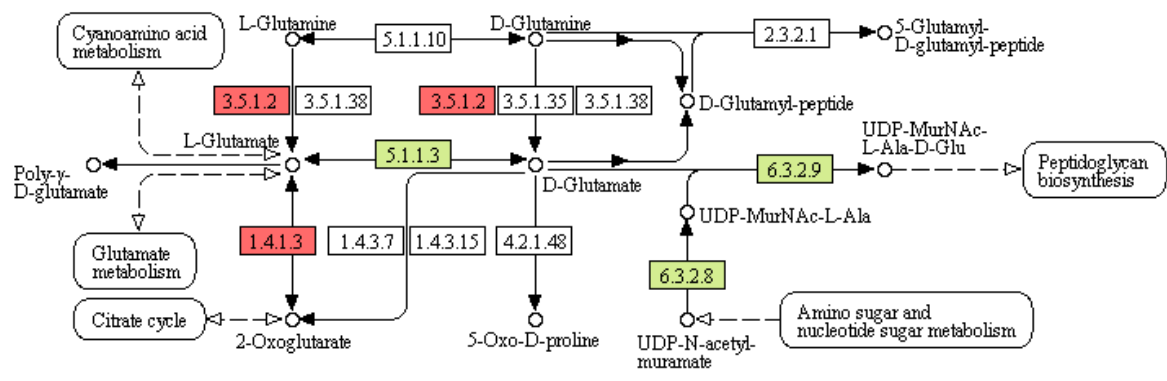

CYANOAMINO ACID METABOLISM

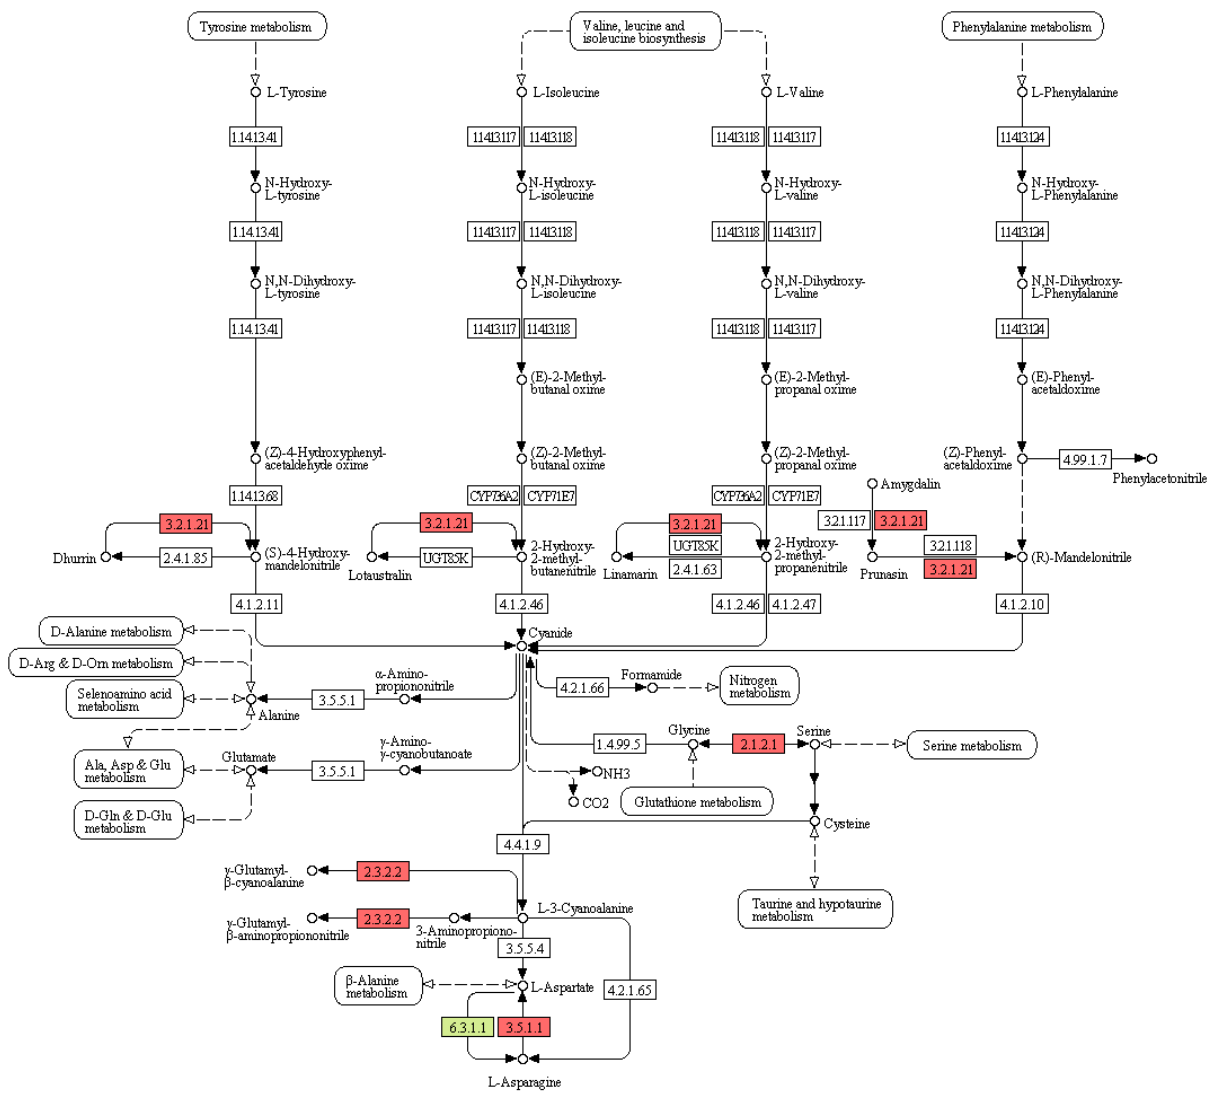

# TAURINE AND HYPOTAURINE METABOLISM

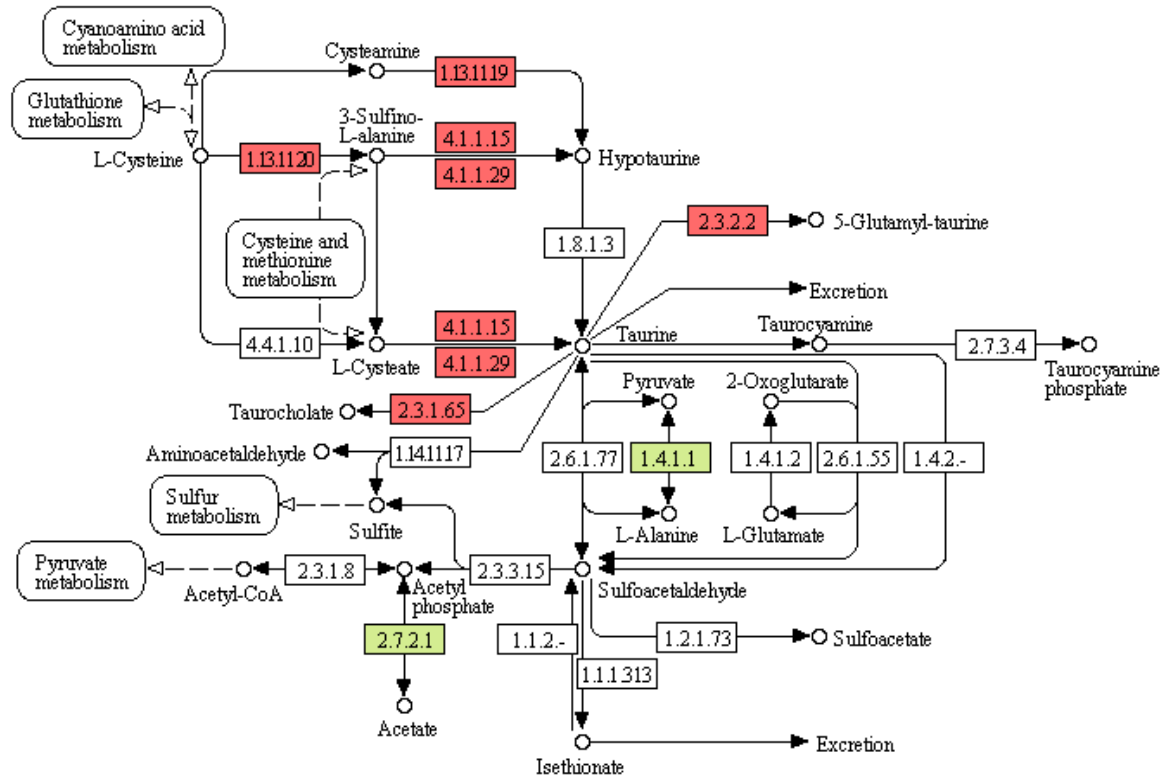

**β-ALANINE METABOLISM**

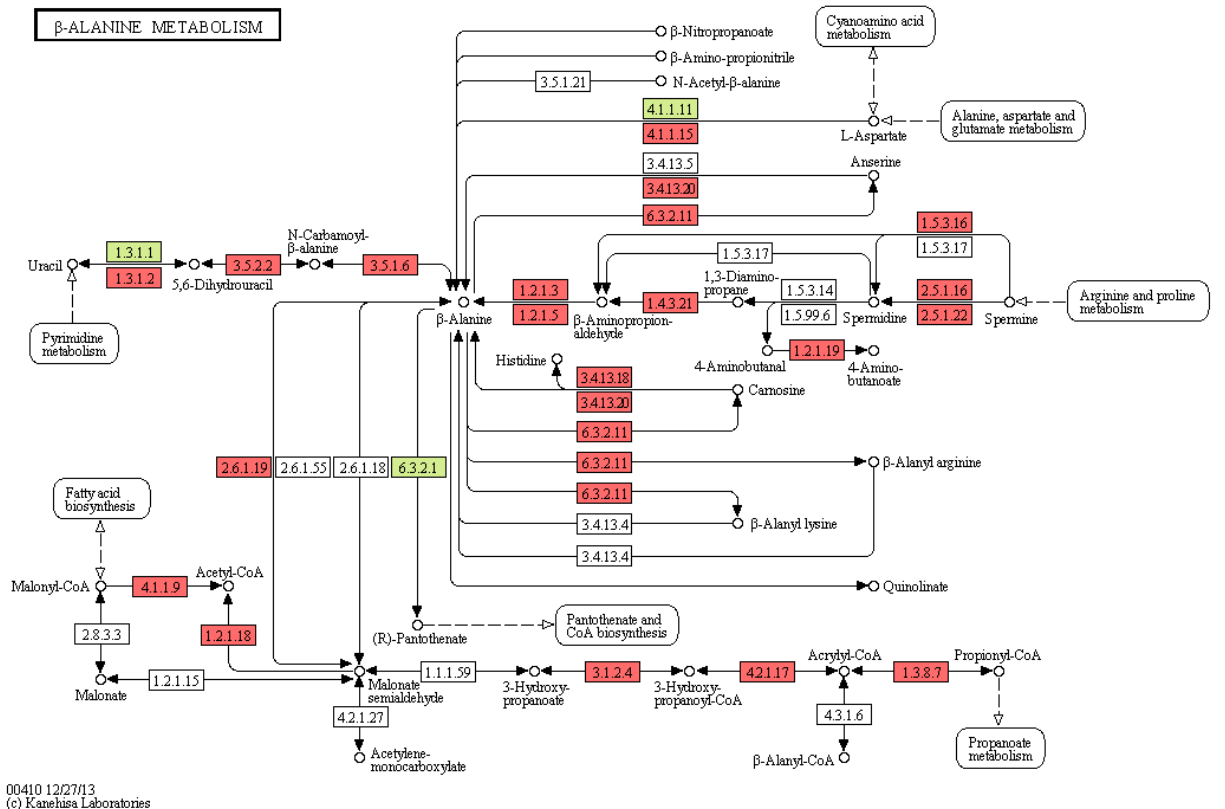

**PHENYLALANINE METABOLISM**

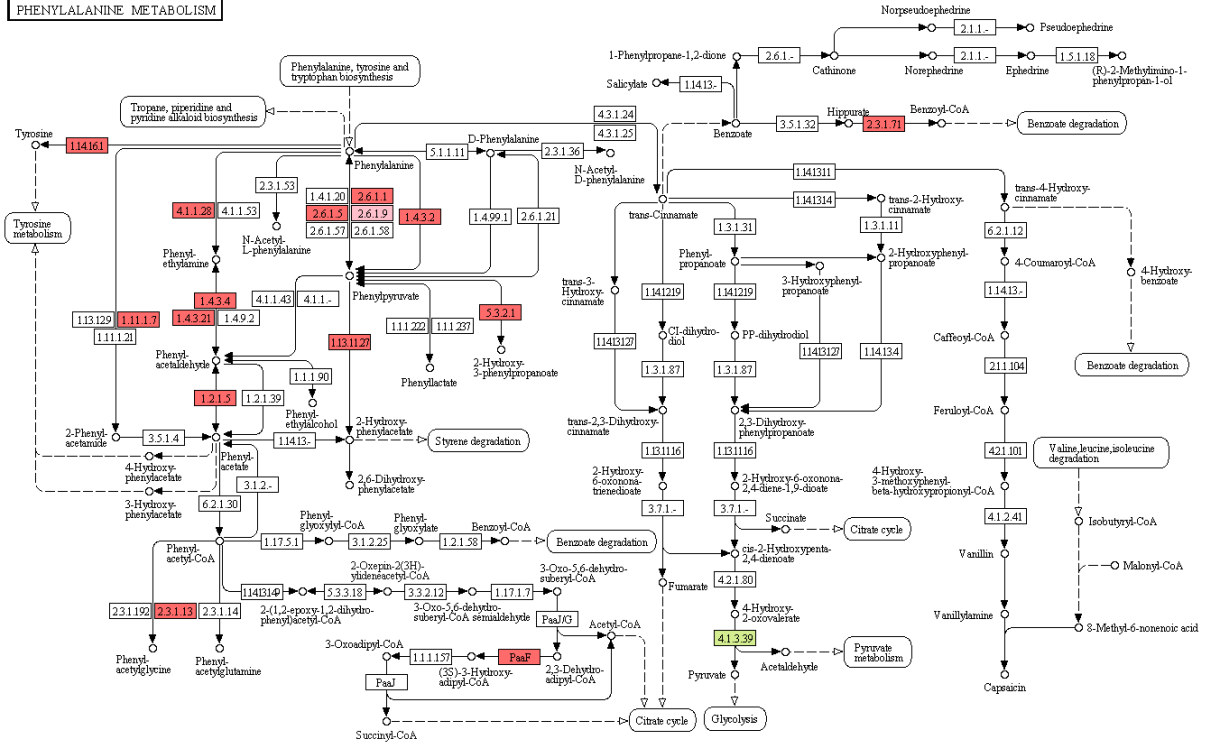

00360 6/17/13  
© Kanehisa Laboratories

# HISTIDINE METABOLISM

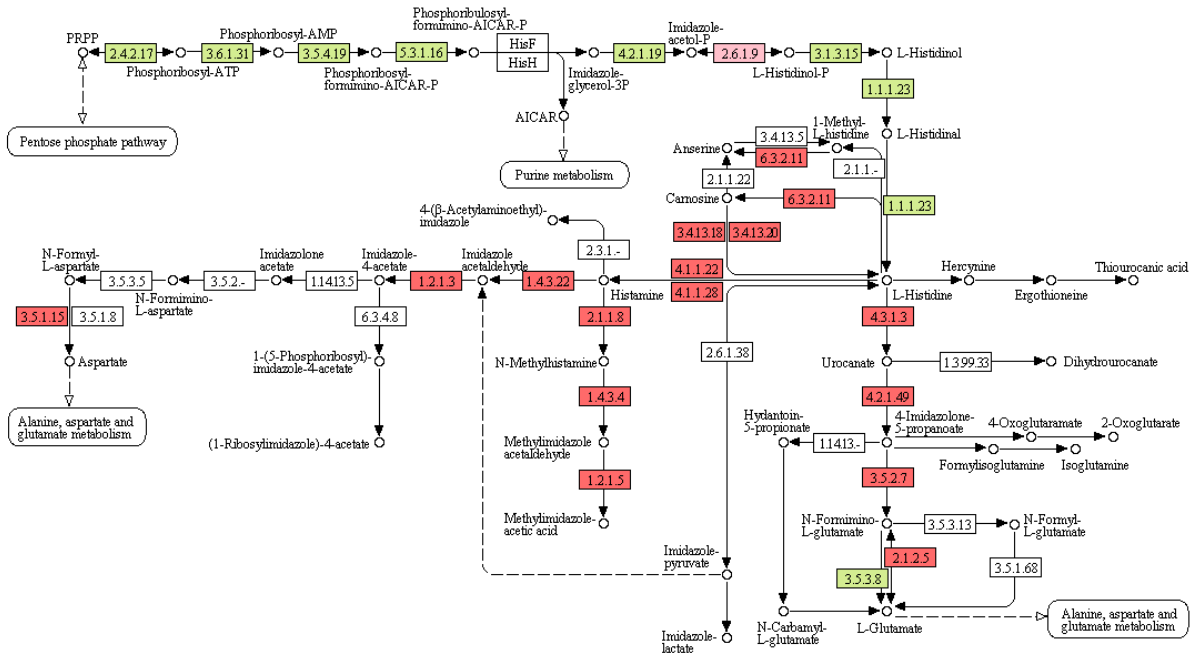



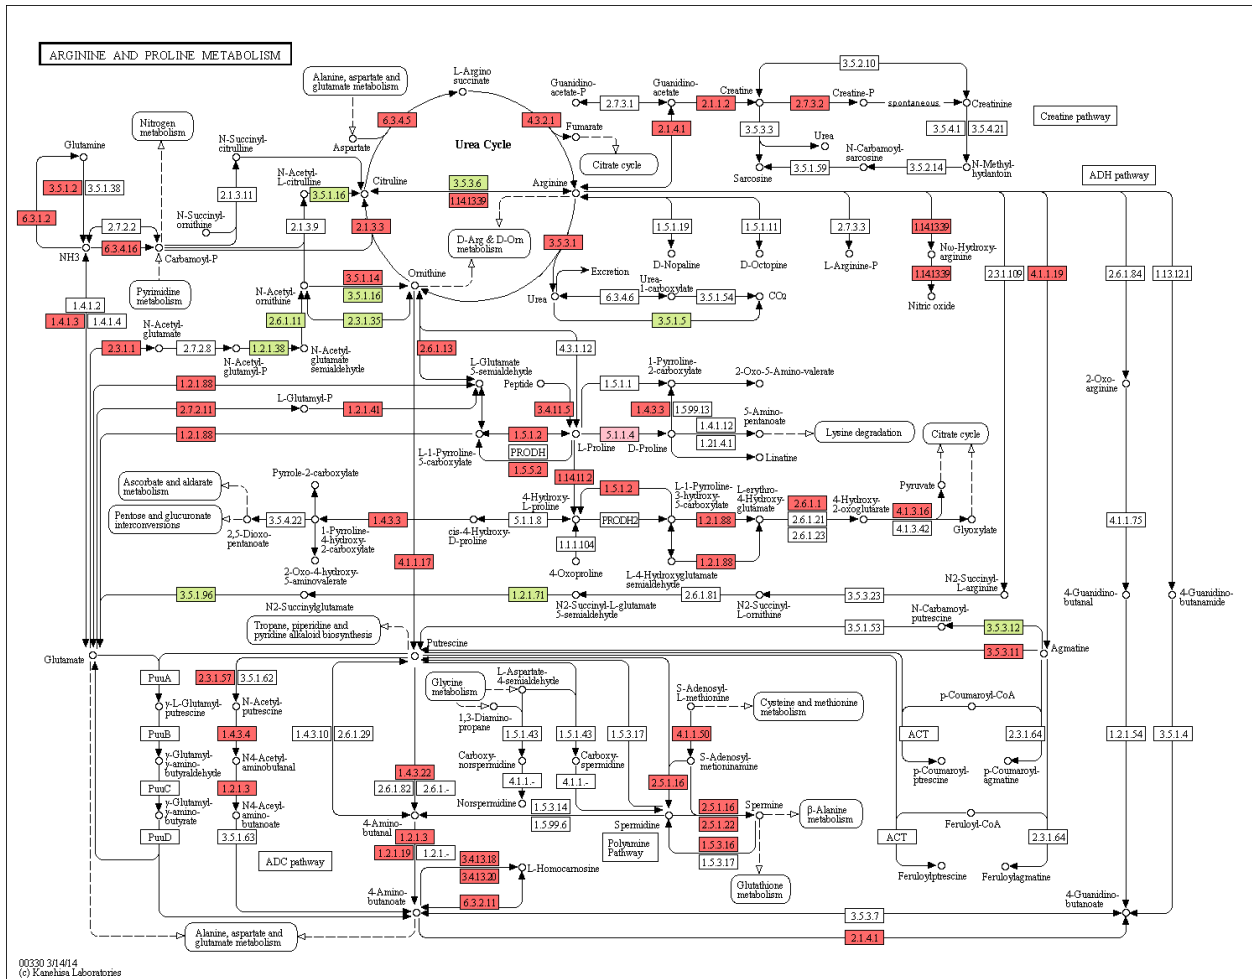

**VALINE, LEUCINE AND ISOLEUCINE BIOSYNTHESIS**

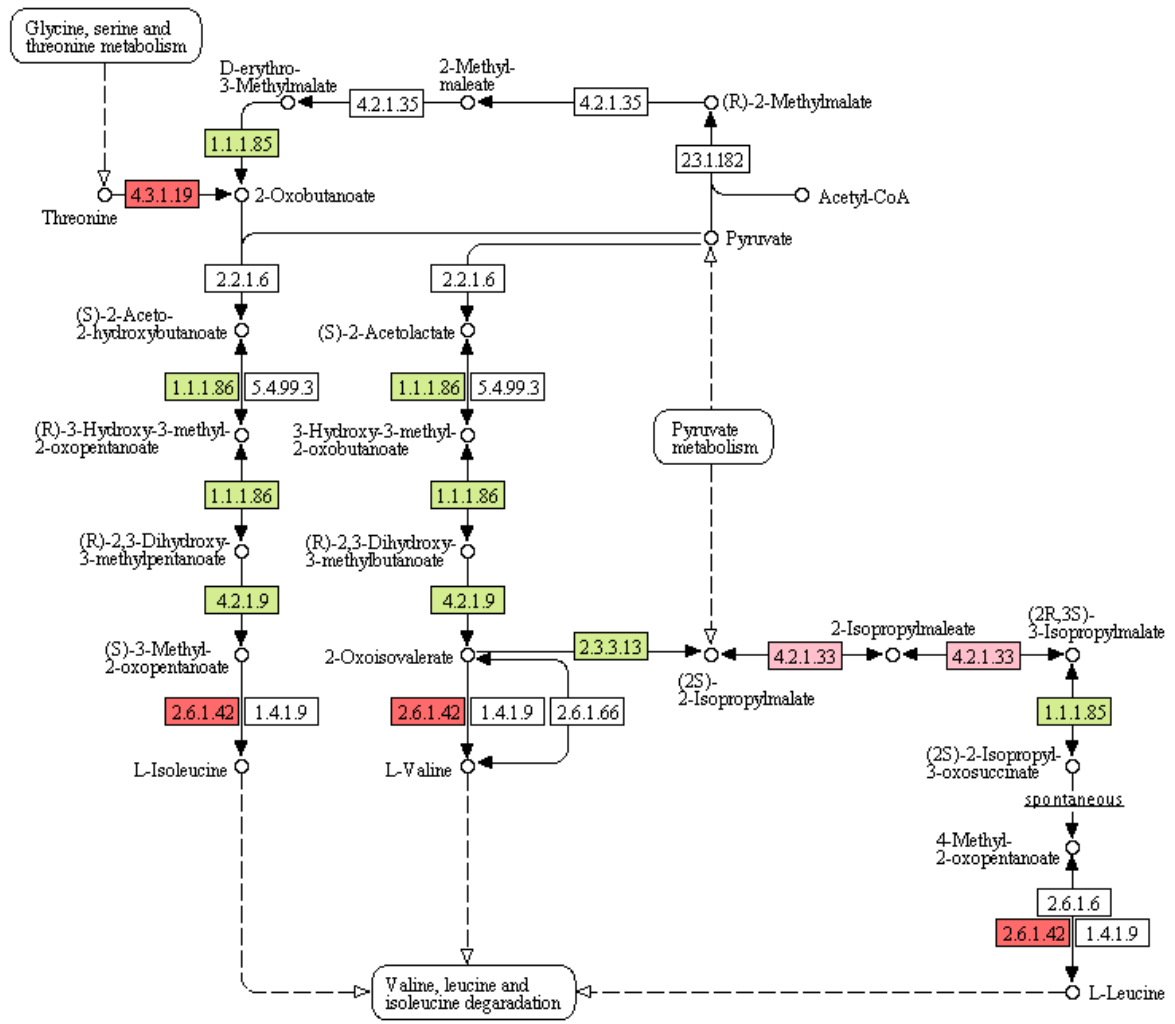

**CYSTEINE AND METHIONINE METABOLISM**

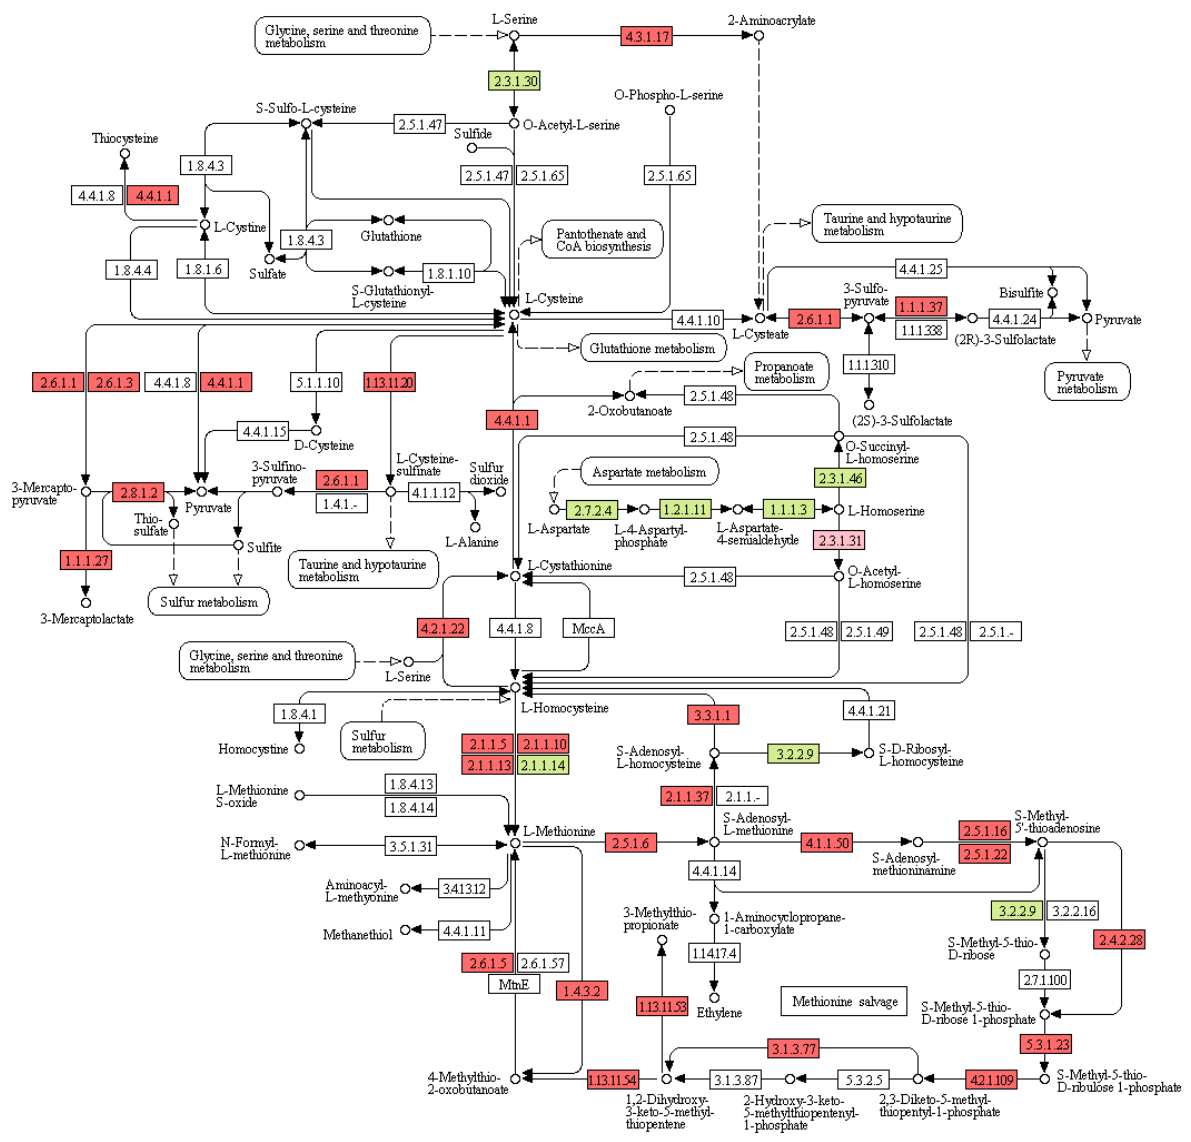

GLYCINE, SERINE AND THREONINE METABOLISM

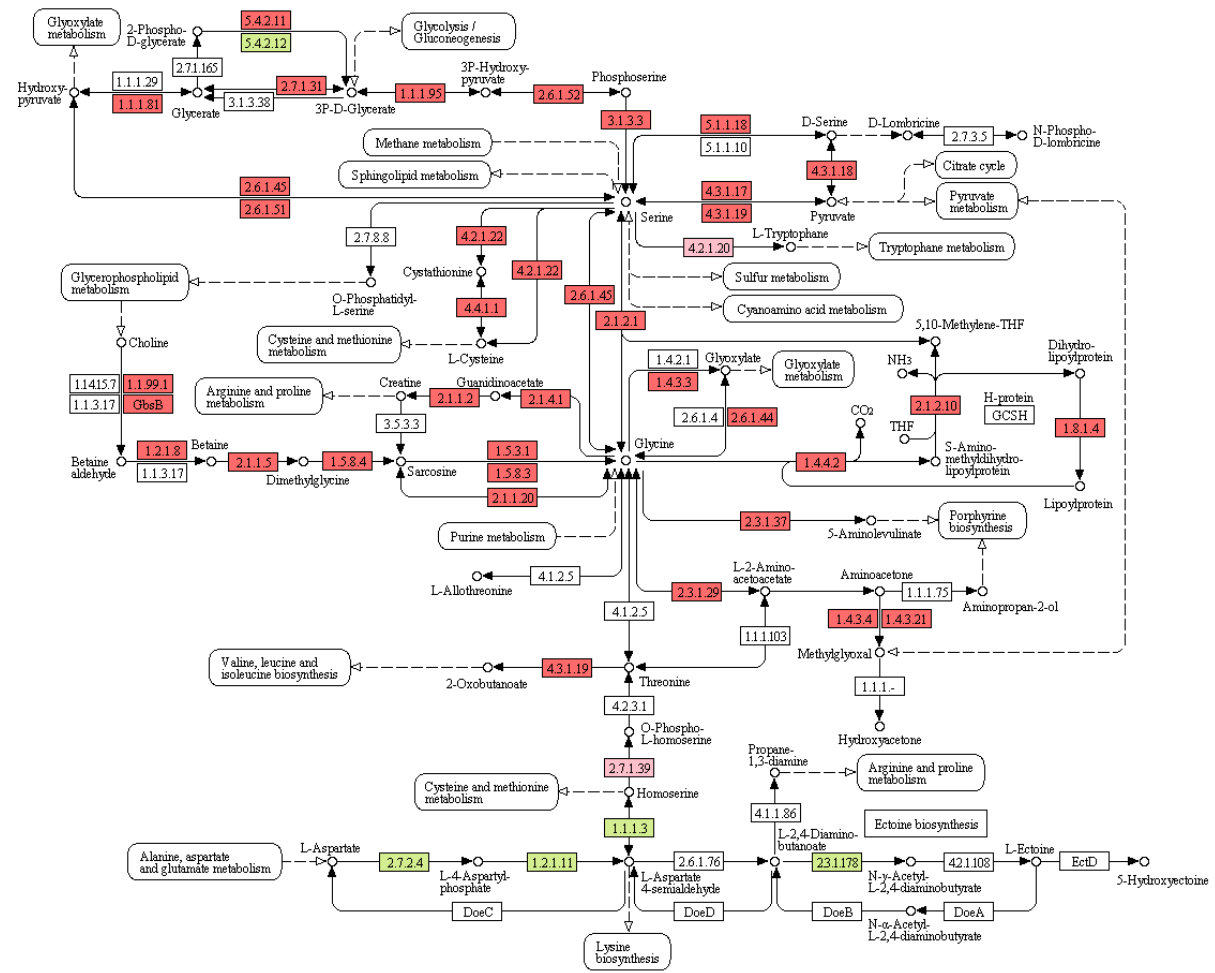

**ALANINE, ASPARTATE AND GLUTAMATE METABOLISM**

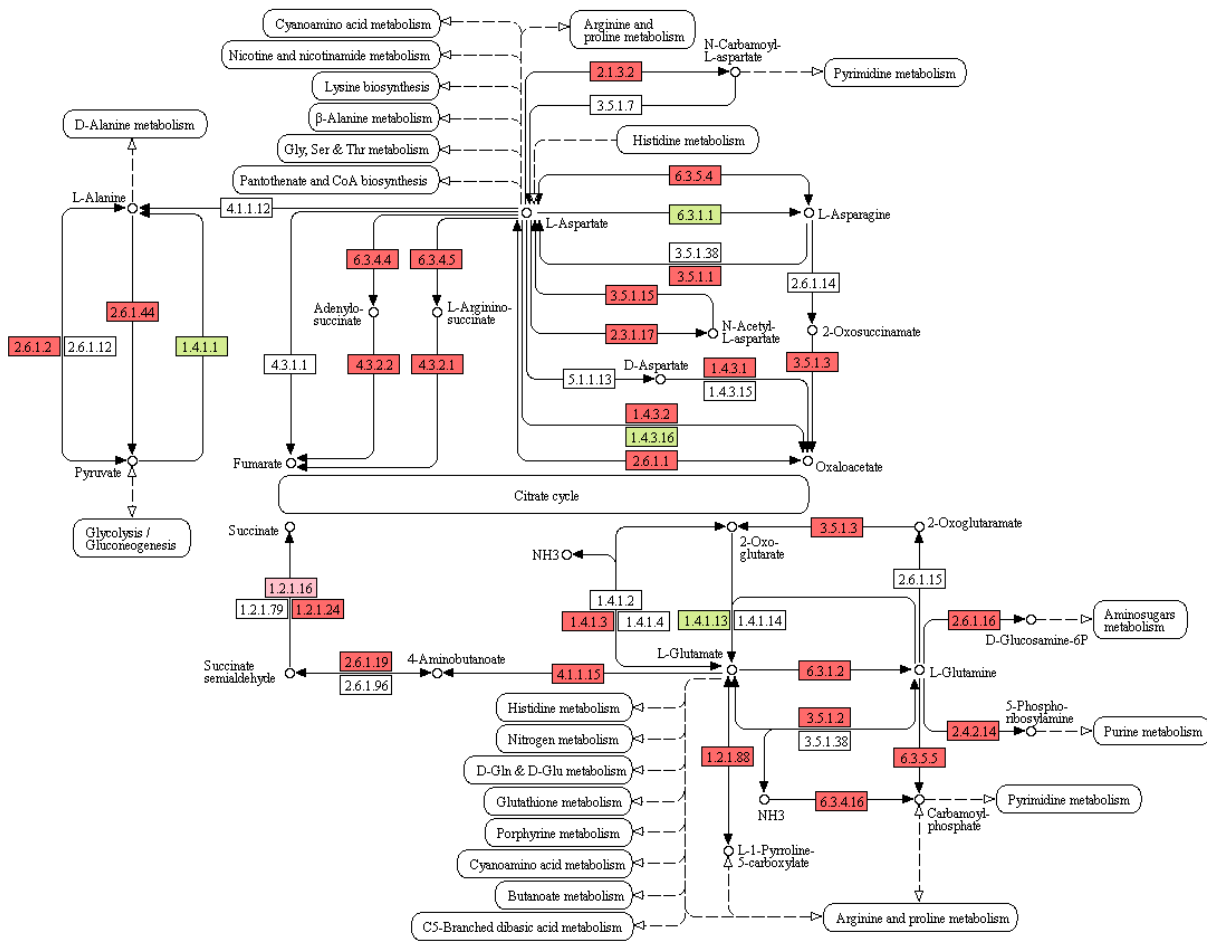

**PYRIMIDINE METABOLISM**

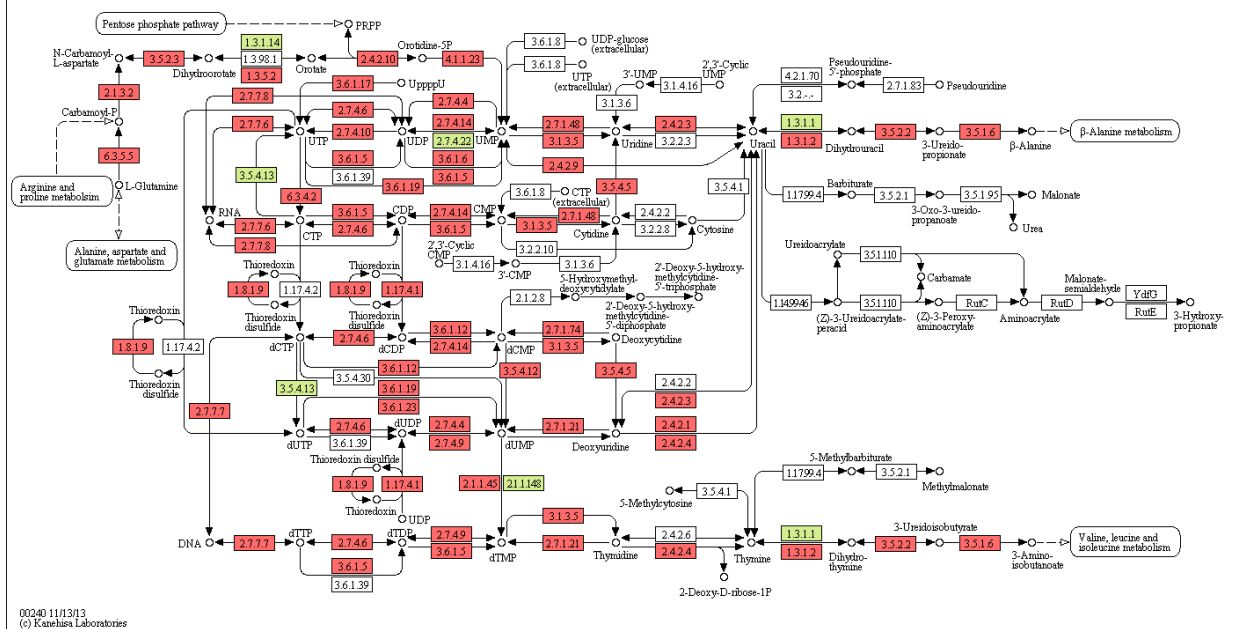

PURINE METABOLISM

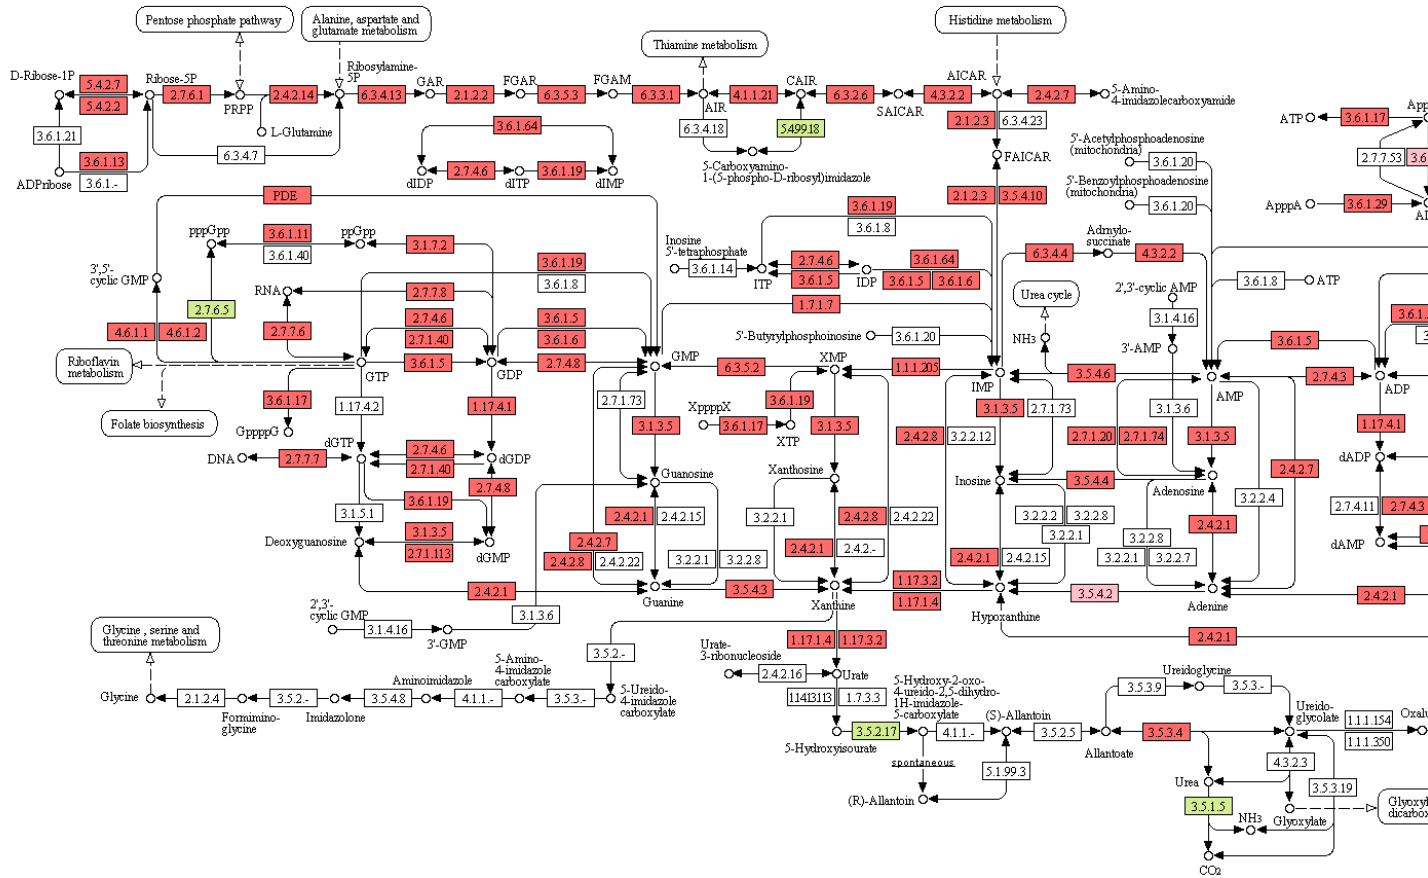

# FATTY ACID BIOSYNTHESIS

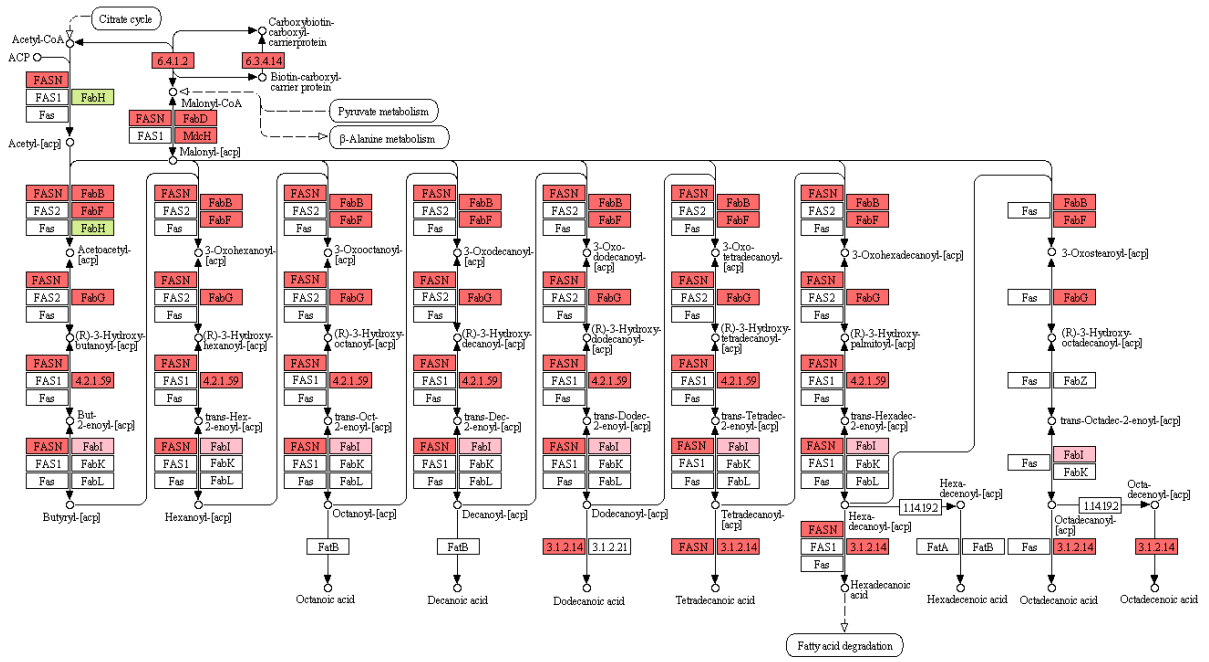





### GALACTOSE METABOLISM

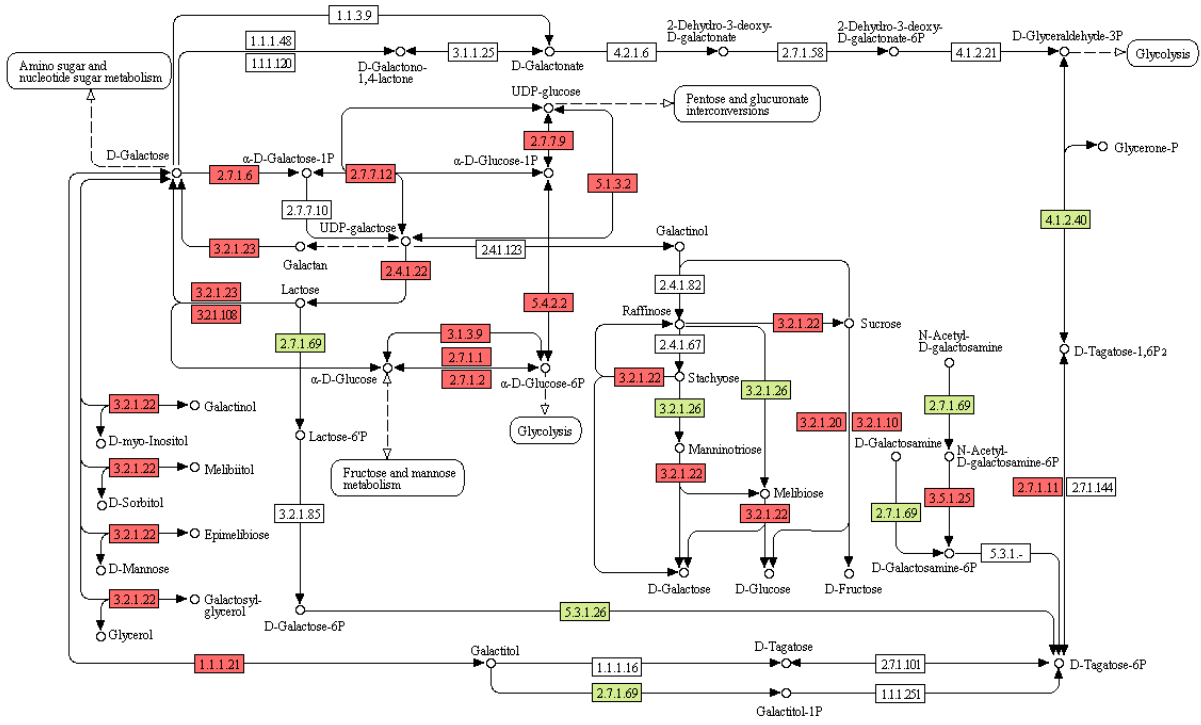

**FRUCTOSE AND MANNOSE METABOLISM**

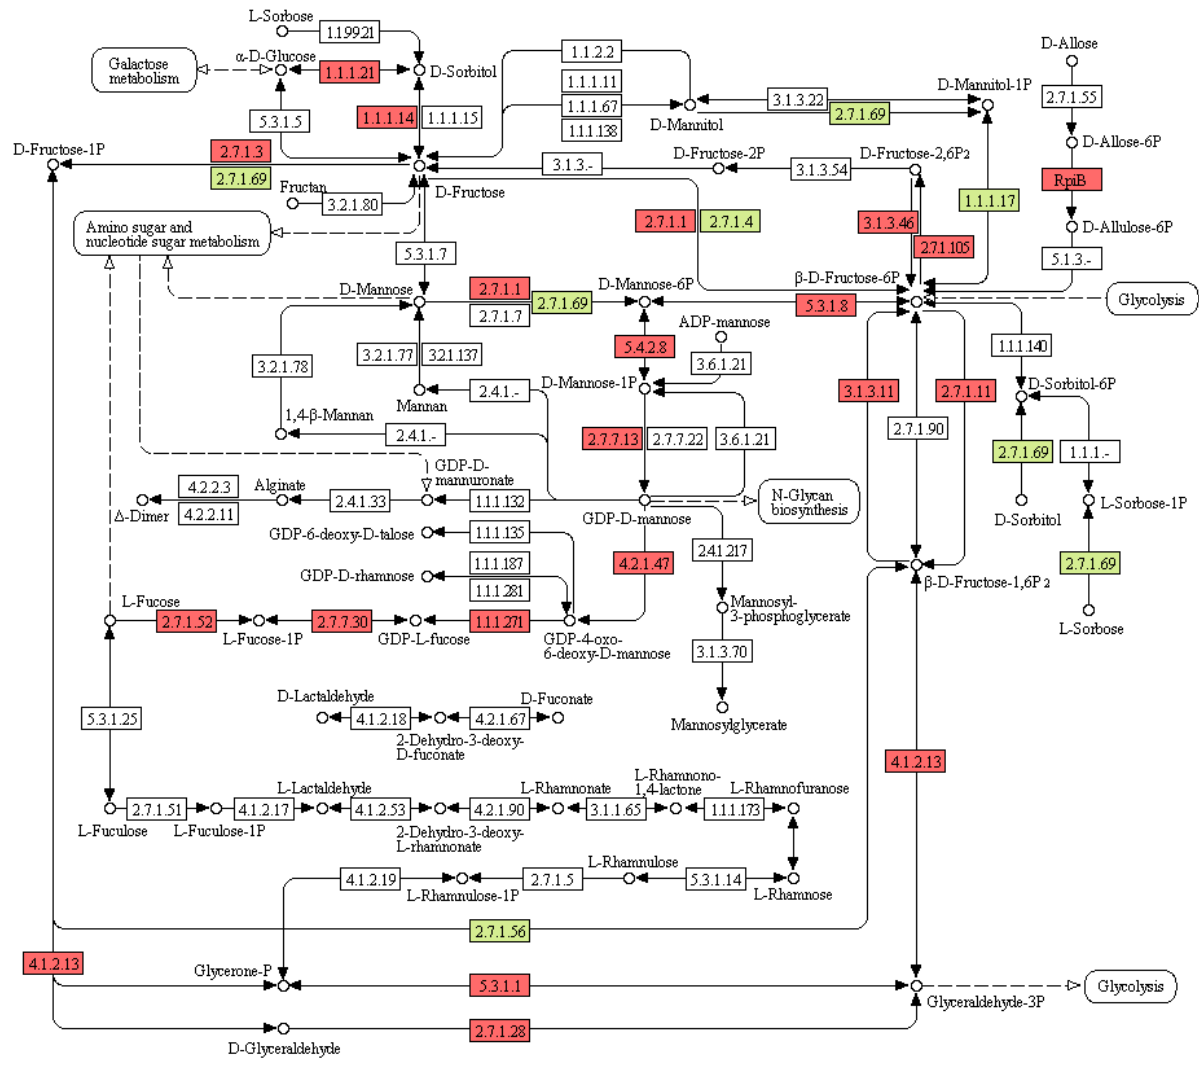

PENTOSE AND GLUCURONATE INTERCONVERSIONS

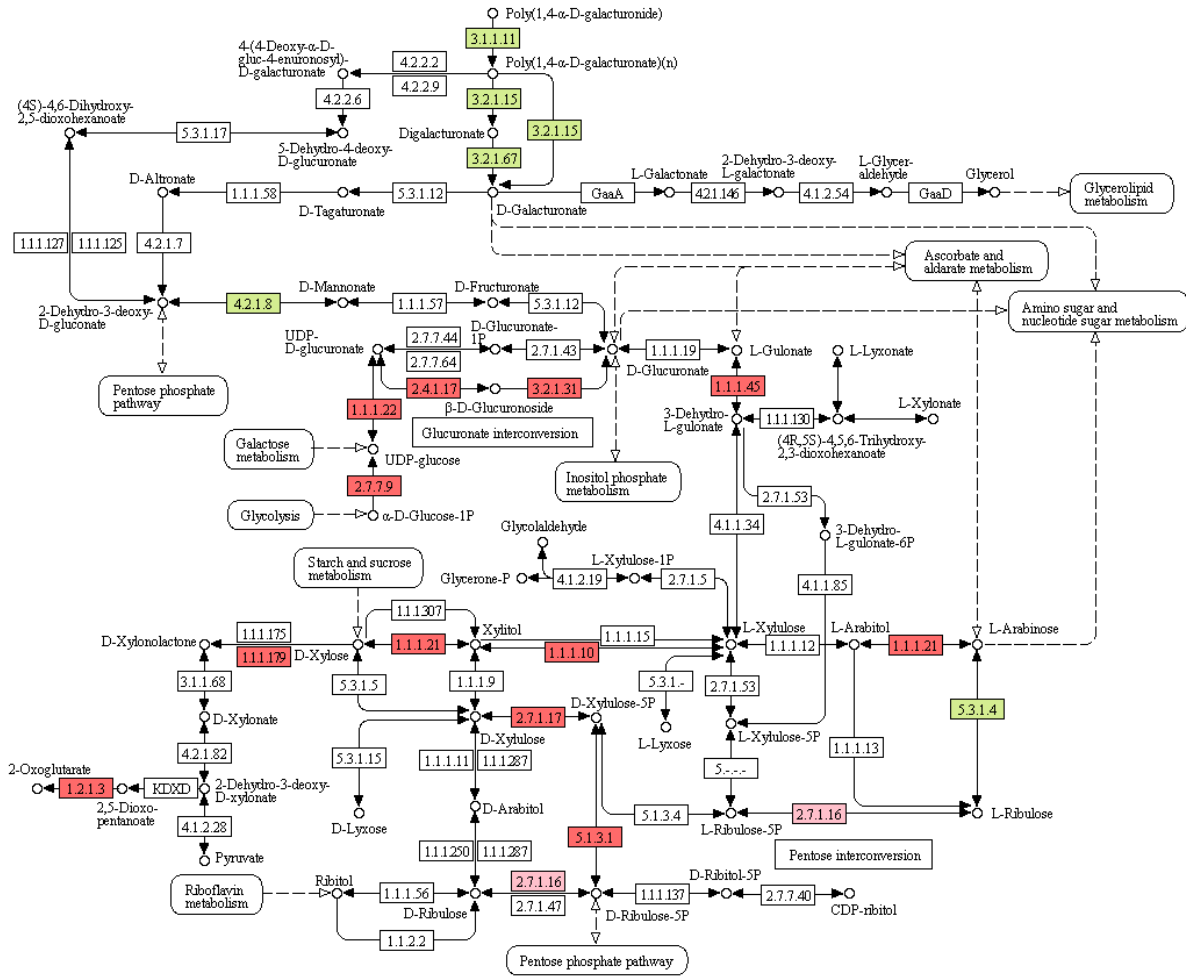

PENTOSE PHOSPHATE PATHWAY

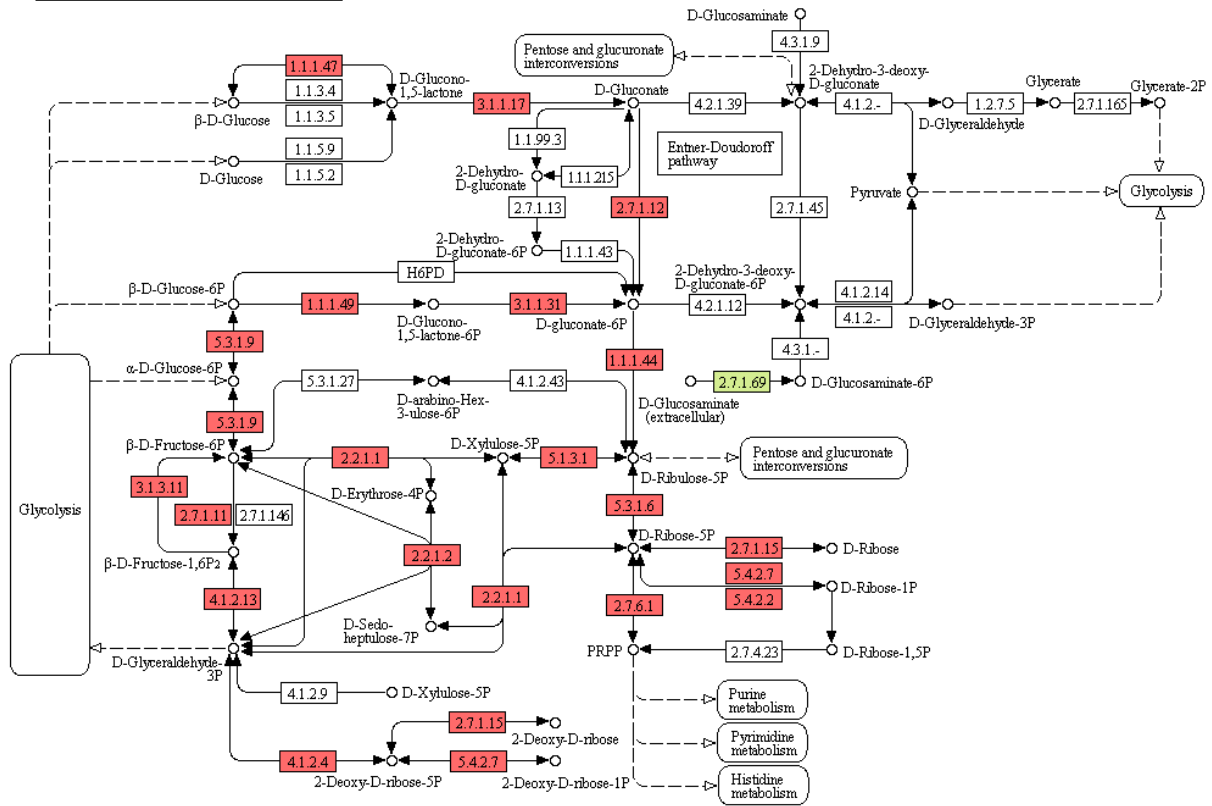

**CITRATE CYCLE (TCA CYCLE)**

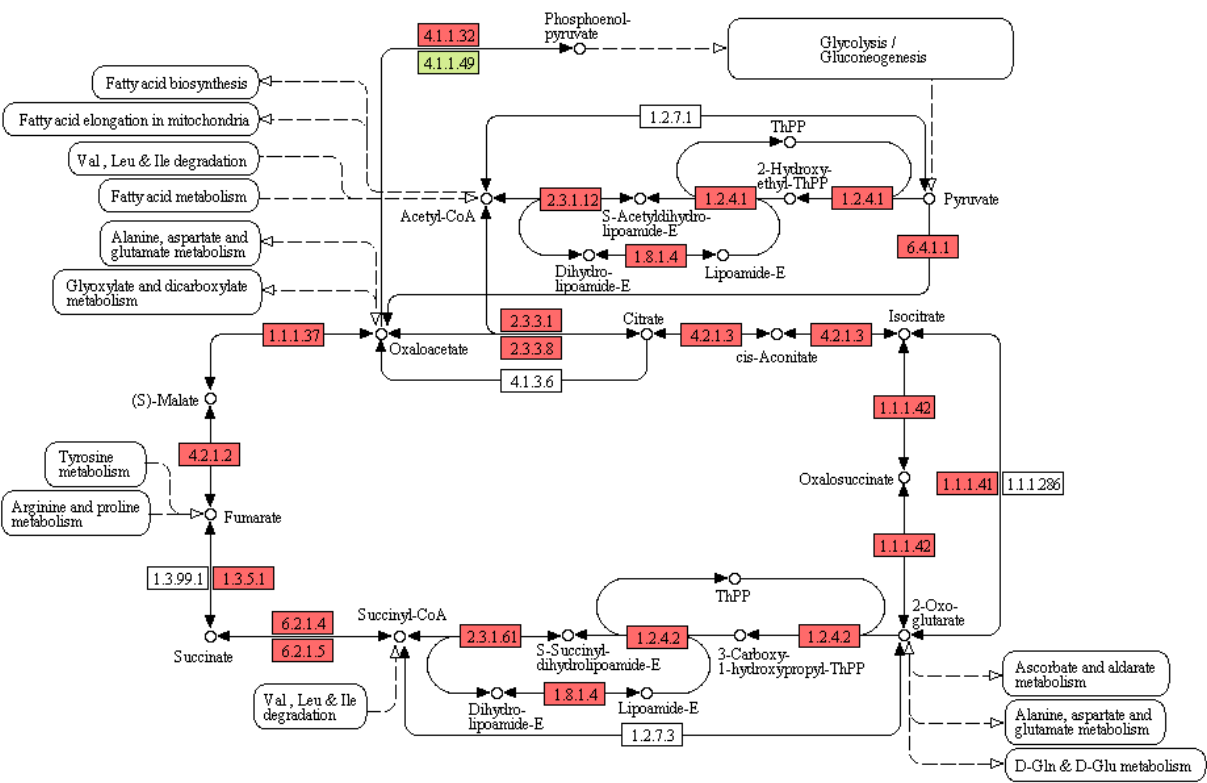

**GLYCOLYSIS / GLUCONEOGENESIS**

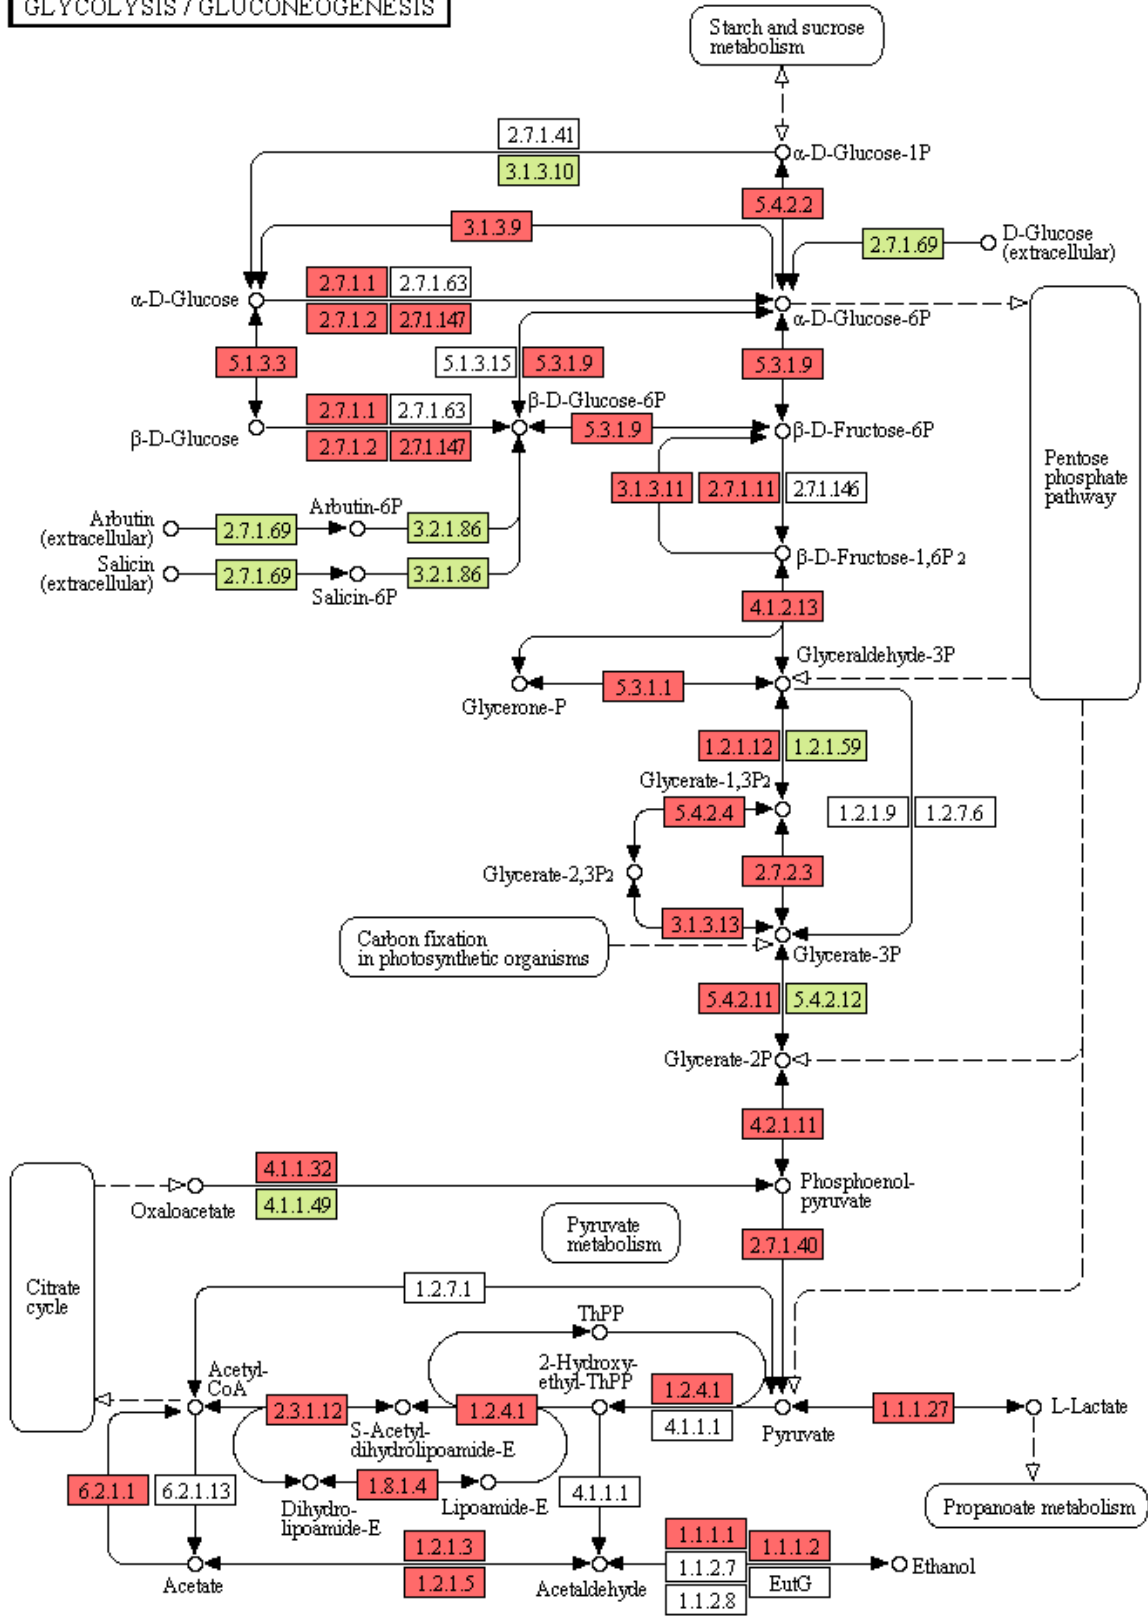

Supplement: 1471-2164-16-S7-S16-S8.pdf [file 1471-2164-16-S7-S16-S8.pdf]
