# Supplementary material for: Application of a hierarchical enzyme classification method reveals the role of gut microbiome in human metabolism
Source: PubMed Central journal article supplement (PMC4474468; doi:10.1186/1471-2164-16-s7-s16), 2015-06-11

## A) Classifier Performance at EC Level 0

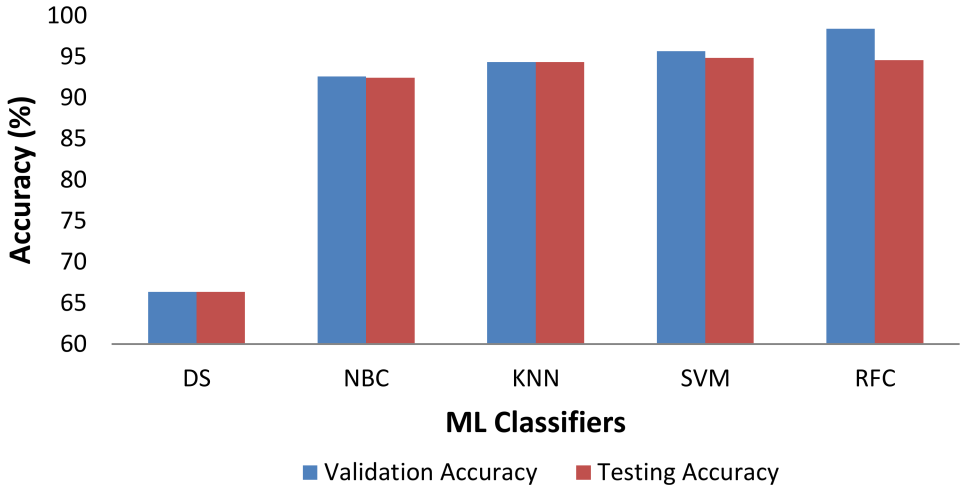

## B) Classifier Performance at EC Level 1

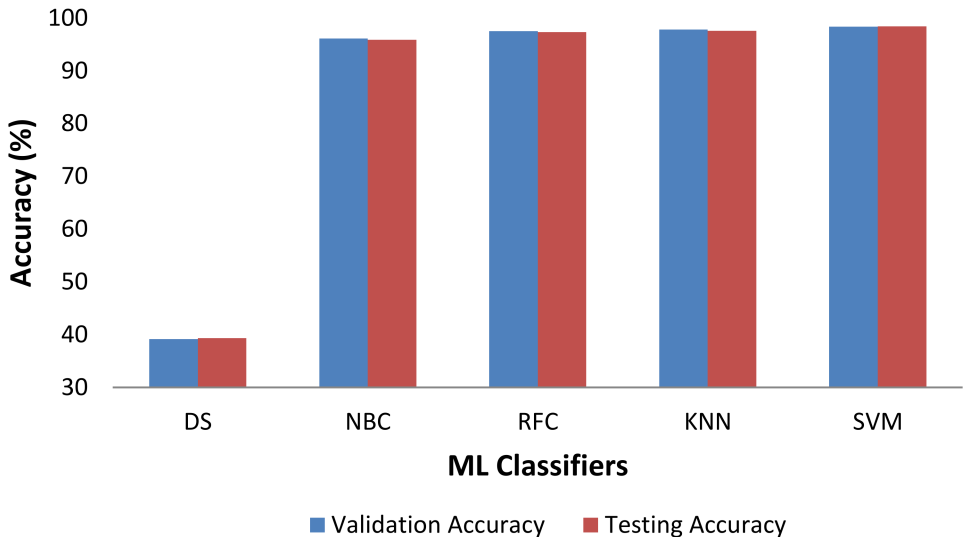

Supplement: 1471-2164-16-S7-S16-S1.pdf [file 1471-2164-16-S7-S16-S1.pdf]
