# Supplementary material for: Application of a hierarchical enzyme classification method reveals the role of gut microbiome in human metabolism
Source: PubMed Central journal article supplement (PMC4474468; doi:10.1186/1471-2164-16-s7-s16), 2015-06-11
Supplement: 1471-2164-16-S7-S16-S2.pdf [file 1471-2164-16-S7-S16-S2.pdf]

**Table S1.** Overall predictions of 2 classifiers vs. 3 classifiers.

| <b>EC Level</b>      | <b>Predicted by<br/>at least 2 of top 3<br/>classifiers</b> | <b>Predicted by<br/>all 3 (top)<br/>classifiers</b> | <b>% Predicted by all<br/>the 3 classifiers</b> |
|----------------------|-------------------------------------------------------------|-----------------------------------------------------|-------------------------------------------------|
| Level-0<br>(Enzymes) | 188866<br>(62674)                                           | 182542<br>(59890)                                   | 96.65<br>(95.58)                                |
| Level-1              | 62167                                                       | 61560                                               | 99.02                                           |
| Level-2              | 61721                                                       | 61237                                               | 99.22                                           |
| Level-3              | 60931                                                       | 60523                                               | 99.33                                           |
| Level-4              | 60199                                                       | 59681                                               | 99.14                                           |
