# Supplementary material for: Application of a hierarchical enzyme classification method reveals the role of gut microbiome in human metabolism
Source: PubMed Central journal article supplement (PMC4474468; doi:10.1186/1471-2164-16-s7-s16), 2015-06-11
Supplement: 1471-2164-16-S7-S16-S4.pdf [file 1471-2164-16-S7-S16-S4.pdf]

**Table S2.** Results showing the accuracy of our method using datasets with sequence identity threshold 70, 60, 50 and 40. Level-0 represents the model to predict if a protein sequence is an enzyme or not. Levels 1-4 represent corresponding levels of the EC number hierarchy.

**\*Correctly predicted:** Instances predicted by at least 2 of top 3 classifiers

| <b>EC Level<br/>CDH70</b> | <b>Number of<br/>sequences</b> | <b>Correctly<br/>Predicted*</b> | <b>% Overall<br/>accuracy</b> | <b>Classes</b> | <b>Model(s)</b> |
|---------------------------|--------------------------------|---------------------------------|-------------------------------|----------------|-----------------|
| Level-0<br>(Enzymes)      | 193240<br>(64948)              | 188866<br>(62674)               | 97.74<br>(96.50)              | 2              | 1               |
| Level-1                   | 62674                          | 62167                           | 99.19                         | 6              | 1               |
| Level-2                   | 62167                          | 61721                           | 99.28                         | 51             | 6               |
| Level-3                   | 61721                          | 60931                           | 98.72                         | 169            | 51              |
| Level-4                   | 60931                          | 60199                           | 98.80                         | 1921           | 169             |

| <b>CDH 60<br/>EC Level</b> | <b>Number of<br/>sequences</b> | <b>Correctly<br/>Predicted*</b> | <b>% Overall<br/>accuracy</b> | <b>Classes</b> | <b>Model(s)</b> |
|----------------------------|--------------------------------|---------------------------------|-------------------------------|----------------|-----------------|
| Level-0<br>(Enzymes)       | 15198<br>46259                 | 148181<br>44246                 | 97.50<br>(95.65)              | 2              | 1               |
| Level-1                    | 44246                          | 43875                           | 99.17                         | 6              | 1               |
| Level-2                    | 43875                          | 43539                           | 99.24                         | 51             | 6               |
| Level-3                    | 43539                          | 42947                           | 98.64                         | 163            | 51              |
| Level-4                    | 42947                          | 42230                           | 98.33                         | 1808           | 163             |

| <b>CDH 50<br/>EC Level</b> | <b>Number of<br/>sequences</b> | <b>Correctly<br/>Predicted*</b> | <b>% Overall<br/>accuracy</b> | <b>Classes</b> | <b>Model(s)</b> |
|----------------------------|--------------------------------|---------------------------------|-------------------------------|----------------|-----------------|
| Level-0<br>(Enzymes)       | 115350<br>(29984)              | 112115<br>(28198)               | 97.20<br>(94.05)              | 2              | 1               |
| Level-1                    | 28198                          | 27900                           | 98.95                         | 6              | 1               |
| Level-2                    | 27900                          | 27647                           | 99.10                         | 51             | 6               |
| Level-3                    | 27647                          | 27191                           | 98.35                         | 156            | 51              |
| Level-4                    | 27191                          | 26665                           | 98.07                         | 1656           | 156             |

| <b>CDH 40<br/>EC Level</b> | <b>Number of<br/>sequences</b> | <b>Correctly<br/>Predicted*</b> | <b>% Overall<br/>accuracy</b> | <b>Classes</b> | <b>Model(s)</b> |
|----------------------------|--------------------------------|---------------------------------|-------------------------------|----------------|-----------------|
| Level-0<br>(Enzymes)       | 85944<br>(17998)               | 84071<br>(16936)                | 97.83<br>(94.10)              | 2              | 1               |
| Level-1                    | 16936                          | 16686                           | 98.53                         | 6              | 1               |
| Level-2                    | 16686                          | 16477                           | 98.75                         | 51             | 6               |
| Level-3                    | 16477                          | 15989                           | 97.04                         | 142            | 51              |
| Level-4                    | 15989                          | 15546                           | 97.23                         | 1453           | 142             |
