# Supplementary material for: Application of a hierarchical enzyme classification method reveals the role of gut microbiome in human metabolism
Source: PubMed Central journal article supplement (PMC4474468; doi:10.1186/1471-2164-16-s7-s16), 2015-06-11

PORPHYRIN AND CHLOROPHYLL METABOLISM

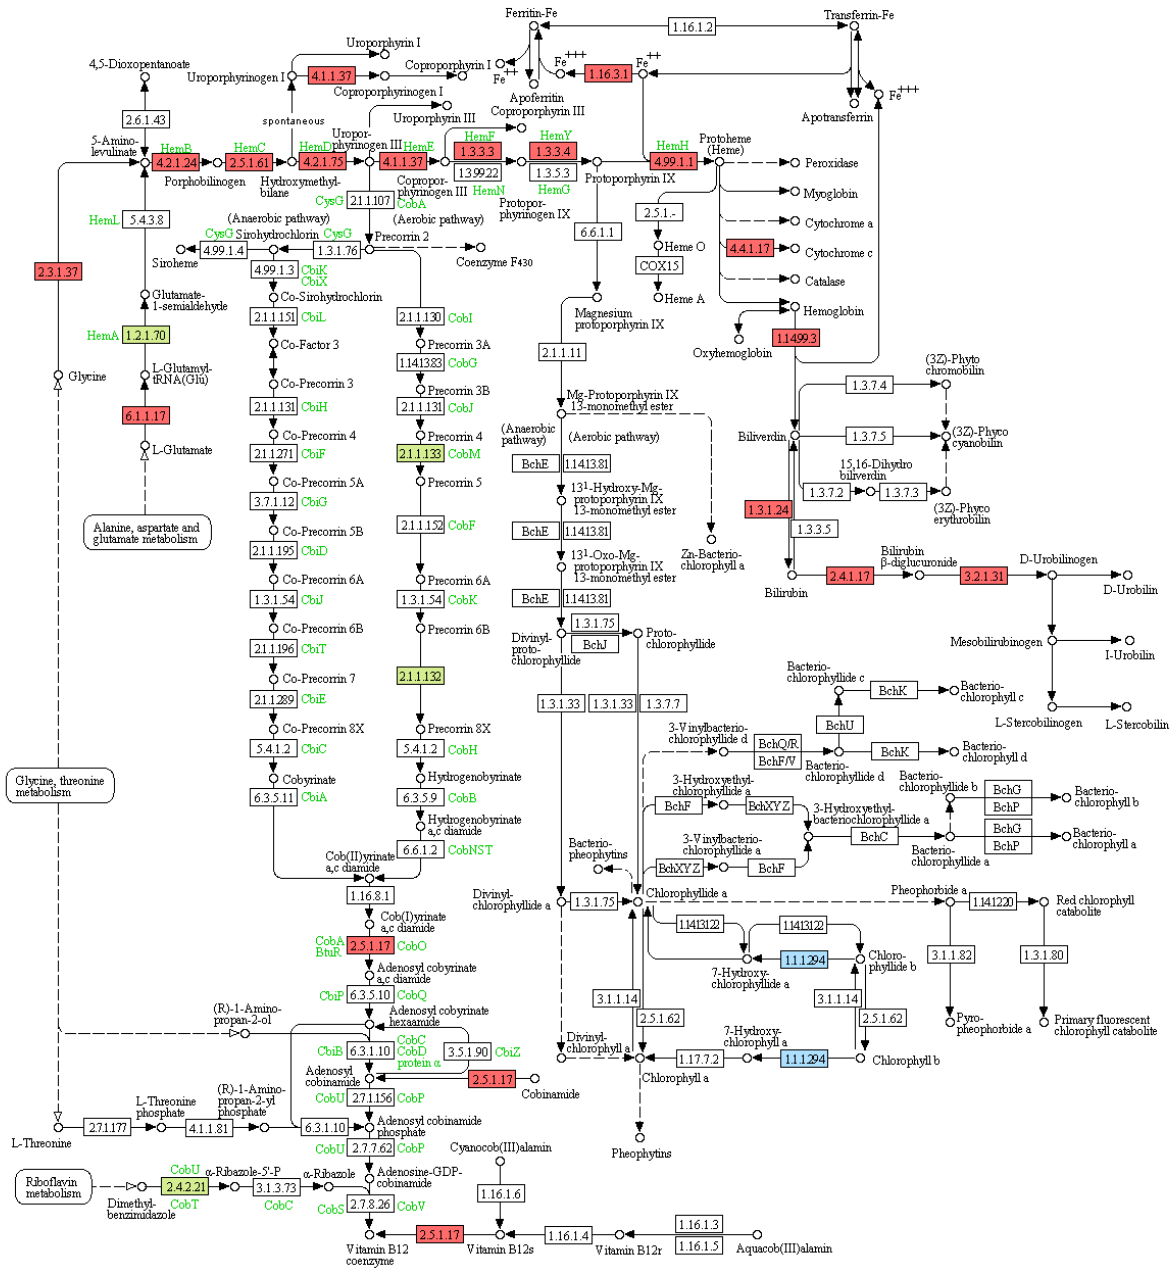

**RIBOFLAVIN METABOLISM**

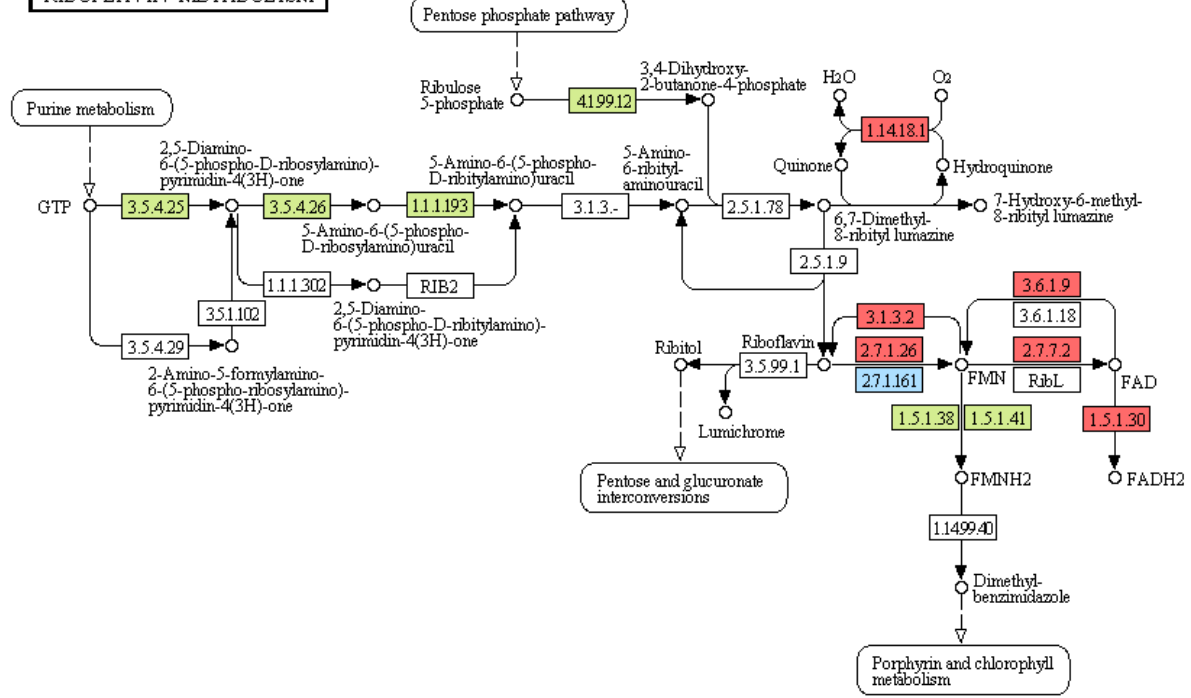

# GLYCEROLIPID METABOLISM

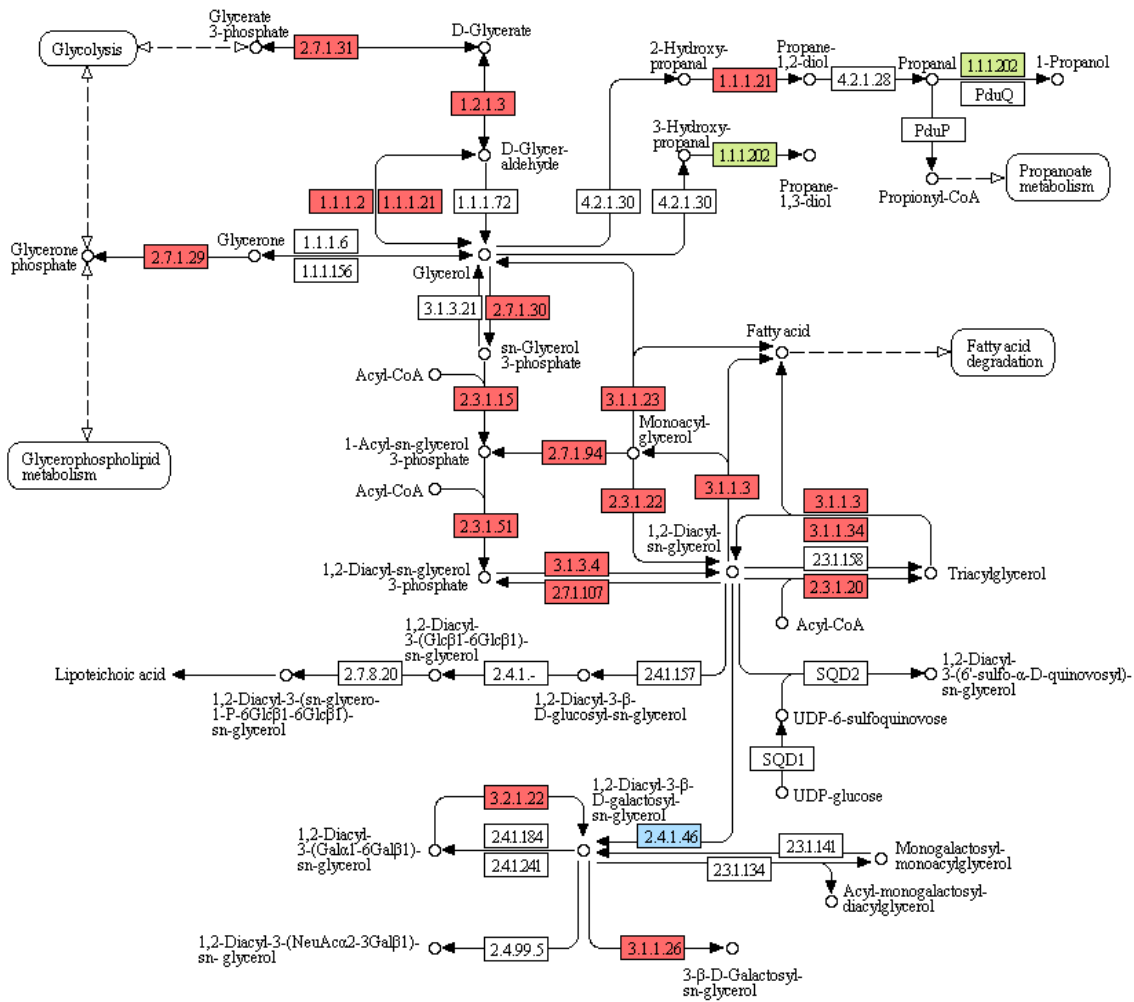

**STARCH AND SUCROSE METABOLISM**

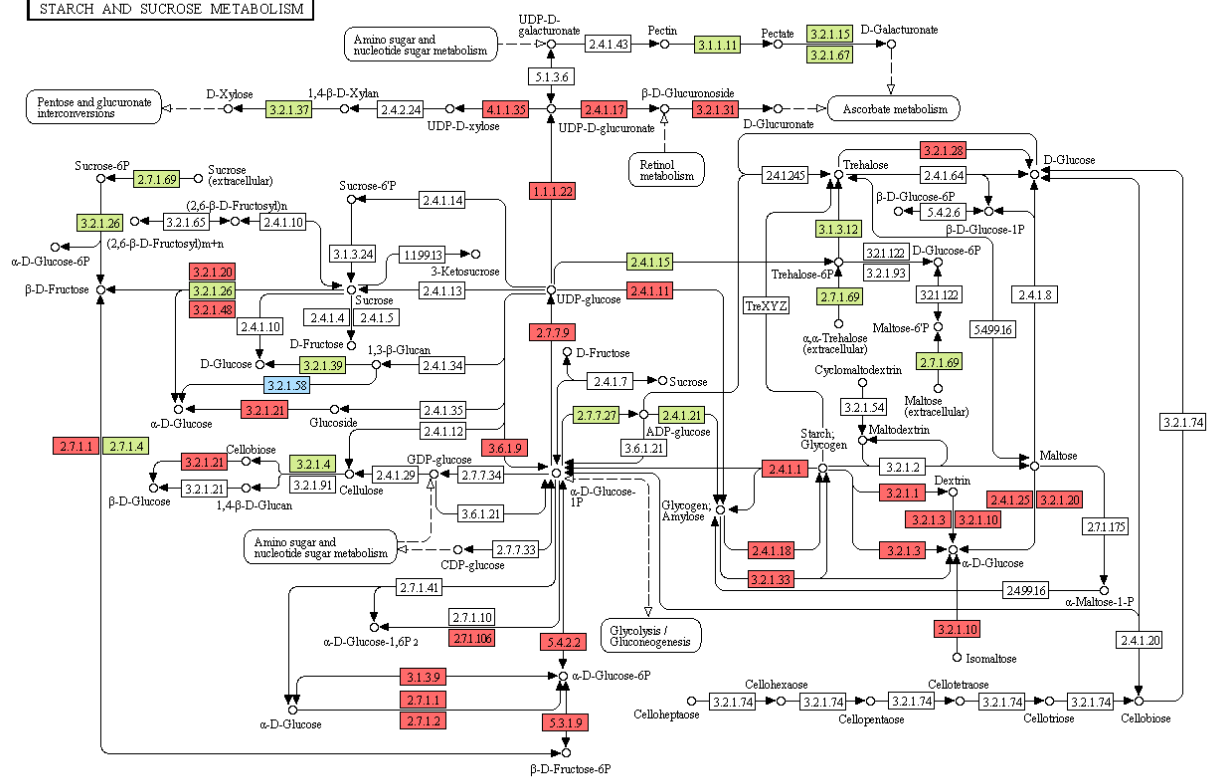

PHENYLALANINE, TYROSINE AND TRYPTOPHAN BIOSYNTHESIS

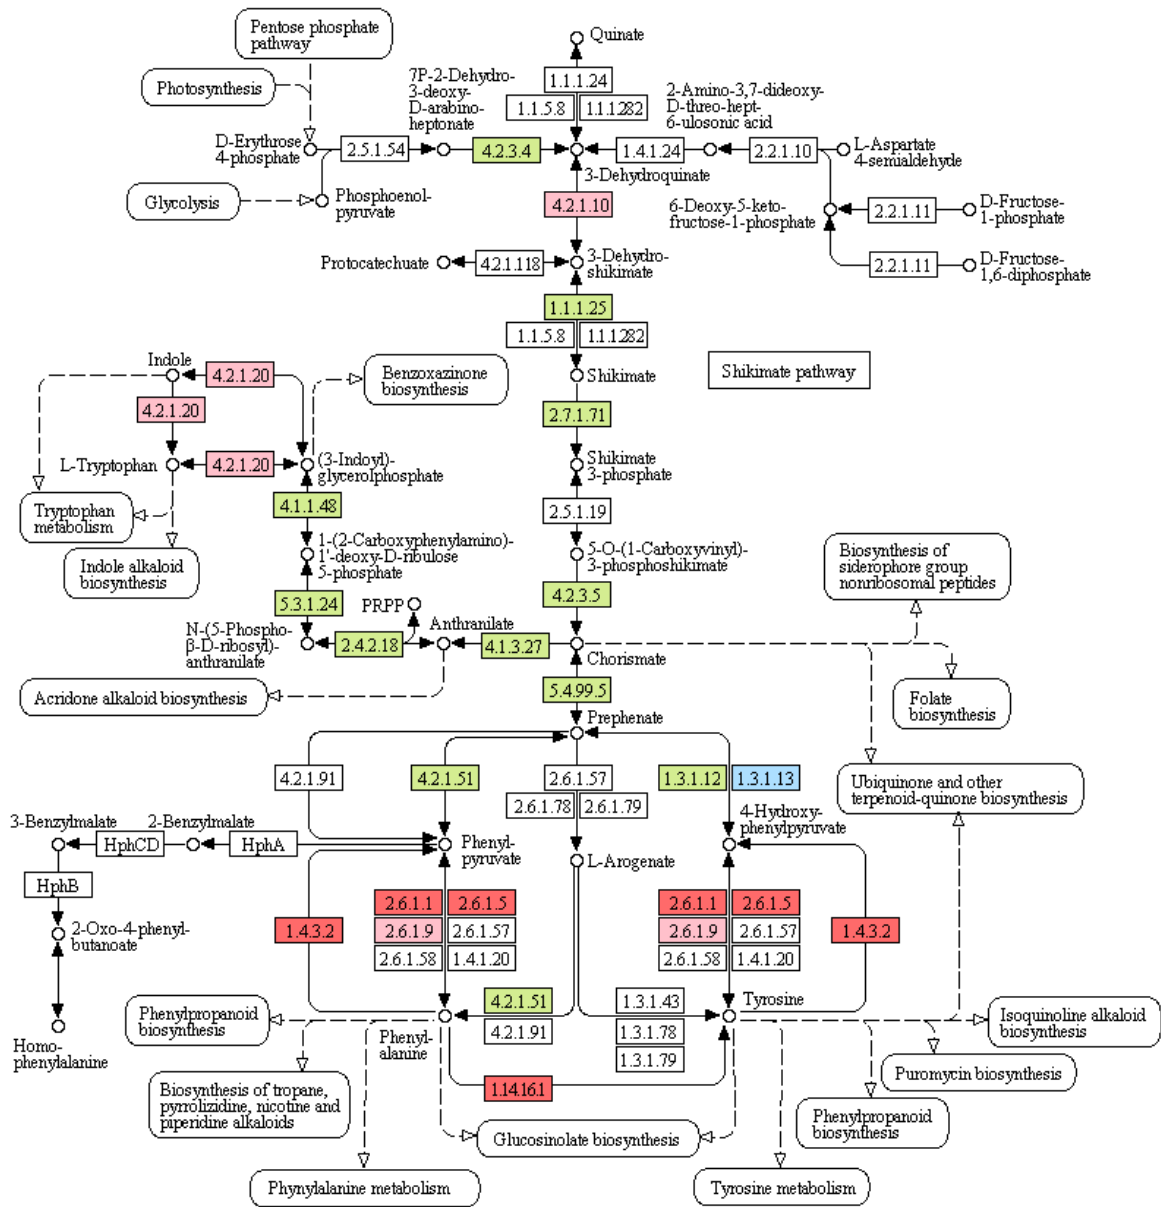

**LYSINE DEGRADATION**

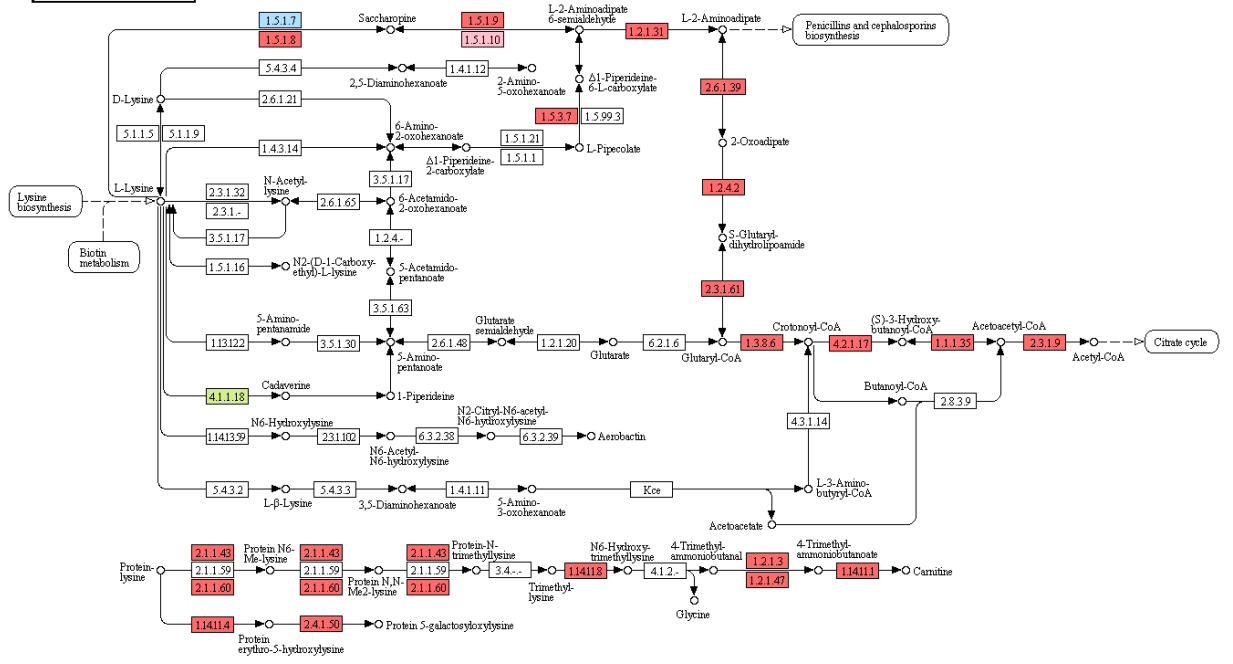

**LYSINE BIOSYNTHESIS**

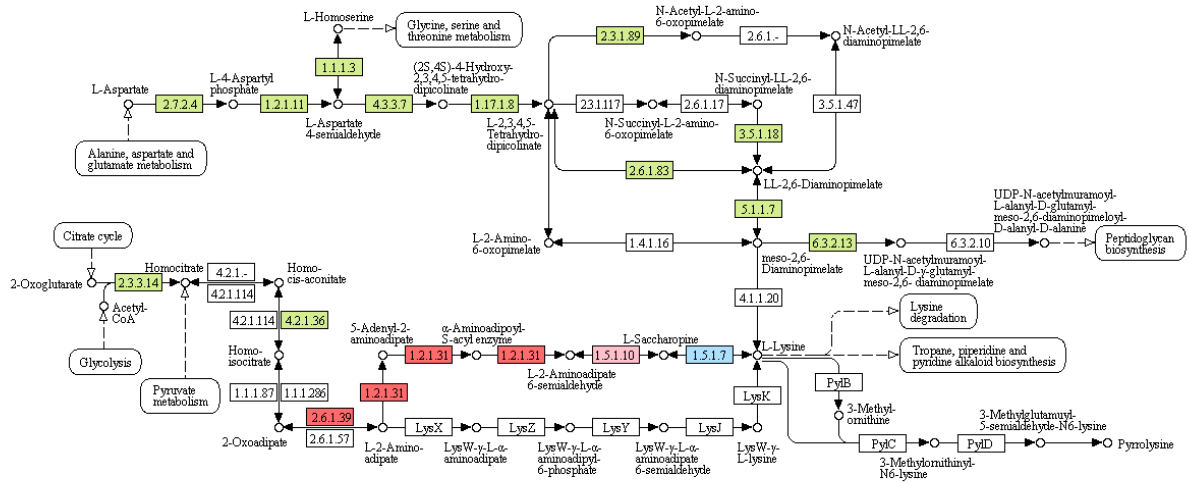

00300 11/19/13  
 (c) Kanehisa Laboratories





UBIQUINONE AND OTHER TERPENOID-QUINONE BIOSYNTHESIS

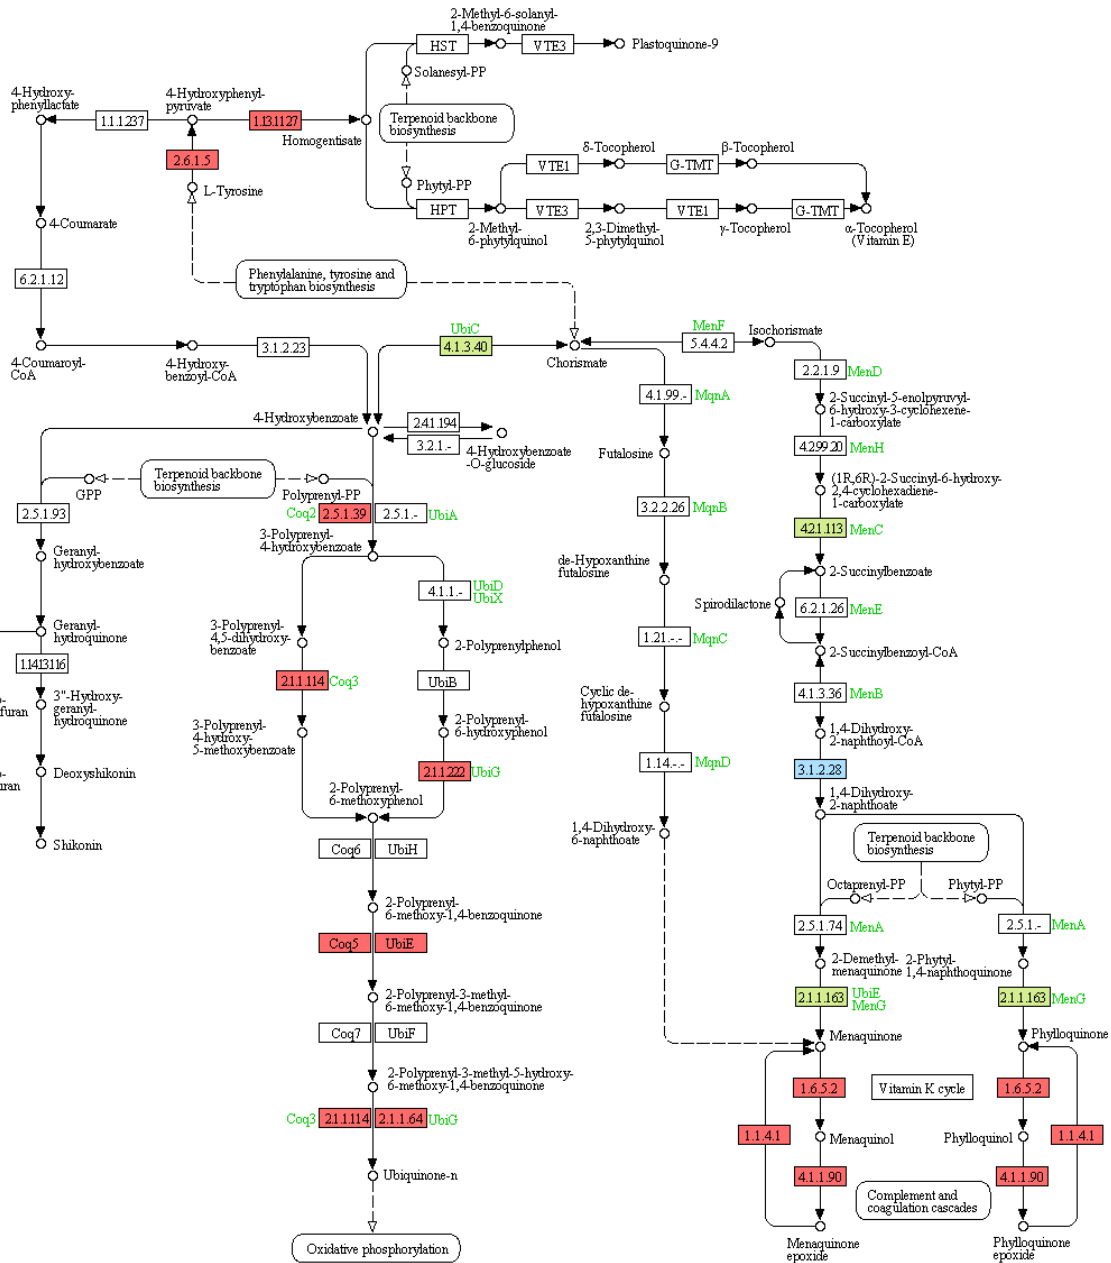

Supplement: 1471-2164-16-S7-S16-S9.pdf [file 1471-2164-16-S7-S16-S9.pdf]
